# 1 Transcriptomic Gene Network Profiling and Weak Signal Detection for Prediction 2 of Ovarian Cancer Occurrence, Survival, and Severity by Integrating Bulk and 3 Single-cell RNAseq Data

4  
5 Yanming Li<sup>1,2</sup>, Mihaela Sardu<sup>1,2</sup>, Devin C. Koestler<sup>1,2</sup>, Fengwei Yang<sup>1</sup>, Md Tamzid Islam<sup>1</sup>,  
6 Stephan Komladzei<sup>1</sup>, Murshalina Akhter<sup>1</sup>

7 1. Department of Biostatistics & Data Science, University of Kansas Medical Center. Kansas City, KS 66160. USA.

8 2. The University of Kansas Cancer Center. Kansas City, KS 66160. USA.

9

## 10 Abstract

11

12 **Background** Ovarian cancer (OC) is a significant gynecological malignancy characterized by its  
13 high mortality rate, poor long-term survival rate, and late-stage diagnosis. OC is the 5th leading  
14 cause of cancer death among woman and counts 2.1% of all cancer death. OC survival rates  
15 are much lower than other cancers that affect woman. Its 5-year survival rate is less than 50%.  
16 Only ~17% of OC patients are diagnosed within the early stage. The majority are diagnosed at  
17 an advanced stage, making early detection and effective treatment critical challenges. Currently,  
18 the identified OC predictive genes are still very sparse, resulting in poor prognostic performance.  
19 There exists unmet needs to identify novel prognostic gene biomarkers for OC occurrence,  
20 survival, and clinical stages to promote the likelihood of survival and to perform optimal  
21 treatments or therapeutic strategies at the earliest stage possible.

22 **Methods** Previous RNAseq analysis on OC focused on detecting differentially expressed (DE)  
23 genes only. Many genes, although having weak marginal differential effects, may still exert  
24 strong predictive effects on disease outcomes through regulating other DE genes. In this work,  
25 we employed a new machine learning method, netLDA, to detect such predictive coregulating  
26 genes with weak marginal DE effects for predicting OC occurrence, 5-year survival, and clinical  
27 stage. The netLDA detects predictive gene networks (PGN) containing strong DE genes as hub  
28 genes and detects coregulating weak genes within the PGNs. The network structures of the  
29 detected PGNs along with the strong and weak genes therein are then used in outcome  
30 prediction on test datasets.

31 **Results** We identified different sets of signature genes for OC occurrence, survival, and clinical  
32 stage. Previously identified prognostic genes, such as *EPCAM*, *UBE2C*, *CHD1L*, *TP53*, *CD24*,  
33 *WFDC2*, and *FANCI*, were confirmed. We also identified novel predictive coregulating weak  
34 genes including *GIGYF2*, *GNPAT*, *RAD54L*, and *ELL*. Many of the detected predictive gene  
35 networks and coregulating weak genes therein overlapped with OC-related biological pathways

36 such as KEGG *tight junction*, *ribosome*, and *cell cycle* pathways. The detection and  
37 incorporation of the gene networks and weak genes significantly improved the prediction  
38 performance. Cellular mapping of selected feature genes using single-cell RNAseq data further  
39 revealed the heterogeneous expression distributions of the signature genes on different cell  
40 types.

41 **Conclusions** We established a transcriptomic gene network profile for OC prediction. The novel  
42 genes detected provide new targets for early diagnostics and new drug development for OC.

43

## 44 Introduction

45 Ovarian cancer (OC) is a significant gynecological malignancy characterized by its high  
46 incidence rate, poor survival, late-stage diagnosis, and limited treatment options [1,2]. It ranks  
47 as one of the most lethal cancers and the 5th leading cause of cancer death among woman [3].  
48 It counts 2.1% of all cancer death. Ovarian cancer survival rates are much lower than other  
49 cancers that affect woman. Its 5-year survival rate is less than 50%. Its survivors often face  
50 physical and psychological challenges, including long-term side effects of treatment, infertility,  
51 and anxiety about cancer recurrence. Women diagnosed before the cancer has spread have a  
52 much higher five-year survival rate than those diagnosed at a later stage. However, only ~17%  
53 of ovarian cancer patients are diagnosed within the early stage. The majority of OC cases are  
54 diagnosed at an advanced stage, making early detection and effective treatment critical  
55 challenges [4].

56  
57 Advances in transcriptomic and genomic research have provided new insights in the discovery  
58 of OC oncogenes. Dozens of OC susceptibility genes, such as *BRCA1* [5-8], *BRCA2* [5-7],  
59 *EPCAM* [9,10], *TP53* [6,6,7], *CHD1L* [13-15], have been identified over the past decades.  
60 However, the sensitivity and specificity using only these genes in prognostics remain  
61 suboptimal. Efforts of using machine learning (ML) methods to identify novel gene biomarkers  
62 for predicting OC occurrence are still ongoing.

63  
64 Compared to cancer occurrence, less research in the literature has been conducted on  
65 prediction of OC survival [15,16] and clinical stages [17,18]. It is particularly of scientific interest  
66 to investigate whether it is the same or different sets of genes that contribute to OC  
67 development and progression (including survival and clinical stages). Identification of novel  
68 oncogenes for predicting OC patients' survival and clinical stages would be extremely helpful to  
69 promote the likelihood of survival and optimal treatment or therapeutic strategies at the earliest  
70 stage as possible, even after the patients being diagnosed of OC.

71  
72 Through a series of work, Li et al. [19-23] have shown that in cancer-genomic studies, some  
73 genes, even though having weak marginal differential effects (DE), may still exude strong  
74 prediction effects on disease outcomes though regulating other strong DE genes. These weak  
75 DE genes (or weak genes), together with their coregulated strong genes and the coregulations  
76 between them, form predictive gene networks (PDN). Detecting such PDNs and the weak genes  
77 therein and integrating them into disease outcome prediction could significantly improve the

78 prediction accuracy. In this project, we used a novel cancer-genomics analytical tool that we  
79 recently developed: netLDA – network-based linear discriminant analysis  
80 (<https://github.com/lyqglyqg/netLDA>) – to detect predictive gene networks and strong/weak  
81 signature genes for predicting OC occurrence, 5-year survival, and clinical stages, using both  
82 bulk and single-cell RNAseq (scRNAseq) data.

83  
84 By looking at the gene-gene coregulation networks and weak genes, novel signature genes  
85 were identified, and the outcome prediction accuracy was significantly increased. The results  
86 helped with a better understanding of the underlining dynamic mechanisms of OC development  
87 and progression. They may shed light on promotion of precision medicine and new gene  
88 therapy development.

89

## 90 **Materials**

91 **Data acquisition and processing.** Bulk RNAseq and clinical data of 419 OC patients from The  
92 Cancer Genome Atlas (TCGA) program and 88 non-disease controls from The Genotype-Tissue  
93 Expression (GTEx) project were combined and used as the training data for OC occurrence  
94 prediction. Bulk RNAseq data in GSE18521 for 53 OC tumor samples and 10 normal ovary  
95 tissue samples from the Gene Expression Omnibus (GEO) database were used as an  
96 independent test dataset in the case-control study. There were 11,069 mapped genes on both  
97 training and test datasets.

98

99 Bulk RNAseq and survival data from GSE26712 for 195 OC patients were downloaded from  
100 GEO and used as the training dataset in the survival prediction. The same types of data for 53  
101 OC patients were downloaded from GSE18521 and used as a test dataset. There were 12,645  
102 common genes mapped on both datasets. The reason for not using TCGA data as the training  
103 data is that TCGA subjects cross a wide range of OC stages, which are heavily confounded with  
104 the survival. We did not find a GEO dataset that contains both survival and clinical stage  
105 outcomes. Therefore, we used two GEO datasets (both of which contained only late-staged OC  
106 patients) as the training and test datasets to alleviate the confounding effect from clinical stages.

107

108 Bulk RNAseq and clinical data from 419 TCGA OC patients and from 77 GSE63885 OC patients  
109 were used as the training and test data, respectively, in the OC clinical stage prediction. There  
110 were 17,490 mapped genes on both training and test datasets.

111

112 Single-cell RNAseq data of 22,153 cells and 47,913 transcripts from GSE229343 were used in  
113 the scRNAseqs data analysis and cellular mapping for the signature genes selected in each  
114 study.

115  
116 The RNAseq data went through quality control before analysis using R package edgeR [24] or  
117 Seurat [25]. For the bulk RNAseq data, genes with counts less than 10 for more than 70% of the  
118 samples were removed from analyses. For the scRNAseq data, cells with UMI numbers below  
119 500, gene numbers below 300 or greater than 6,000, or mitochondrial-derived UMI counts of  
120 more than 15% were considered low-quality and were removed [103].

121

## 122 **Methods**

123 Three studies were conducted for prediction of different OC outcomes: i) occurrence prediction  
124 of OC v.s. healthy, ii) 5-year survival prediction of survival longer than 5 years v.s. shorter than 5  
125 years, and iii) severity prediction of clinical stage  $\leq$  III v.s. V. The following methods were used in  
126 each study.

127

128 **PGN and network-based weak gene selections.** We use the netLDA [20] in both feature  
129 selection and outcome prediction. **Figure 1** depicts the major steps of netLDA. First, netLDA  
130 selects top strong DE gene as hub genes according to their marginal DE effects. Then for each  
131 strong DE gene, netLDA selects its coregulated gene network containing its highly correlated  
132 genes (having a Pearson correlation coefficient  $\rho$  with  $|\rho| > 0.8$ ). Next, netLDA assigns the  
133 following predictive score, or network-adjusted DE effect, to each gene in a selected  
134 coregulating network,  $PS_i = \sum_{j \in C_i} \Omega_i (\bar{E}_j^{(1)} - \bar{E}_j^{(2)})$ , where  $i$  and  $j$  are gene indices,  $C_i$  is the set of  
135 genes connected to gene  $i$  through a coregulation path,  $\Omega_i$  is the precision matrix (inverse of  
136 the covariance matrix) that characterizes the coregulation information (directions and strengths)  
137 between genes in  $C_i$ , and  $\bar{E}_j^{(1)}$  and  $\bar{E}_j^{(2)}$  are the average expression level of gene  $j$  in outcome  
138 groups 1 and 2, respectively. The predictive score integrates, for each targeted gene, how many  
139 other genes it coregulates, the strengths and directions of those regulations, and expression  
140 levels of its coregulated genes, as well as expression levels of the targeted gene itself. The  
141 most predictive genes are selected according to the strengths of their predictive scores.  
142 Selected predictive genes with small marginal DE effects are weak coregulating genes. For  
143 prediction, netLDA uses only the selected predictive genes and the coregulation network  
144 structures between them to predict outcomes on the test data. **Figure 2** explains the calculation

145 of the predictive scores using toy example data. We also developed permutation tests to  
146 evaluate the significance of selected individual genes and PGNs.

147

148 **Prediction performance comparison with competing ML methods.** We compared the  
149 prediction performance of netLDA with other commonly used cancer-genomics ML methods  
150 including Lasso [26], Ridge [27], ElasticNet [28], XGboost [29], and linear discriminate analysis  
151 (LDA) using only the strong genes and ignoring the coregulatory network structures between  
152 them. Prediction sensitivities, specificities, and the areas under the receiver operating  
153 characteristic curves (ROC) were evaluated to assess the prediction.

154

155 **Kepler-Meijer analysis.** Kepler-Meijer (KM) analysis is a commonly used biomarker validation  
156 approach in cancer genomics studies. It compares the survival or KM curves between high- and  
157 low- expressed groups of a DE gene [30]. Here we generated KM curves according to the long-  
158 and short-term survival groups predicted by using the selected strong and weak genes, and  
159 their PGN structures. We compared the KM curves to the ones generated from only using the  
160 top strong genes' expression levels.

161

162 **Gene set enrichment analysis.** To validate our identified genes and PGNs from a biological  
163 perspective, we conducted gene set enrichment analysis (GSEA) [31], a knowledge-based  
164 approach for interpreting transcriptome profiles, using GeneOntology (GO) [32] and Kyoto  
165 Encyclopedia of Genes and Genomes (KEGG) [33] pathways. The selected strong/weak genes  
166 and PGNs were mapped to the top enriched KEGG pathways to confirm their oncological  
167 functionals.

168

169 **Cellular mapping for the selected genes.** To reveal the cellular expression heterogeneity of  
170 the selected signature genes, we also performed a scRNAseq analysis for cell type profiling and  
171 cellular mapping of the selected genes.

172

## 173 **Results**

174 **Predictive gene network and network-based gene selections.** Top selected genes in the  
175 three studies are listed in **Table 1**. Marginal expression patterns for the selected genes are  
176 depicted in **Figure 3**. Top selected PGNs harboring the selected genes were listed in **Table 2**.  
177 Topological structures (illustrating the connection topologies) and connection matrices  
178 (illustrating the connection strengths) of the PNGs, along with marginal and network-adjusted

179 DE effects of the genes within, were depicted in **Figure 4**. Most of the selected strong genes  
180 have both a significant marginal p-value (from marginal tests) and a significant permutation test  
181 p-value ( $<10^{-4}$ , from a network-based test). While majority of the selected weak genes have only  
182 a significant permutation test p-value. This demonstrates that integrating of coregulation  
183 between genes helps to promote the significance of weak genes in their empirical distributions.  
184 For many of the top selected genes, we found literature evidence supporting their associations  
185 with OC (last column in **Table 1**). Most of the selected predictive gene networks have significant  
186 permutation test p-values ( $<0.05$ ). Full lists of the selected genes and PGNs are given in the  
187 Supplemental Materials.

188  
189 We confirmed strong genes previously reported. *SMPDL3B* (marginal p-value= $8.8\times 10^{-182}$ ,  
190 network-adjusted permutation p-value  $< 10^{-4}$ ) and *SLC34A2* (marginal p-value= $1.9\times 10^{-190}$ ,  
191 network-adjusted permutation p-value  $< 10^{-4}$ ) were confirmed in the OC occurrence study,  
192 *TRAFD1* (marginal p-value = 0.0013, network-adjusted permutation p-value  $< 10^{-4}$ ) and *CHD1L*  
193 (marginal p-value = 0.0021, network-adjusted permutation p-value  $< 10^{-4}$ ) were confirmed in the  
194 5-year survival study, and *FANCI* (marginal p-value = 0.0016, network-adjusted permutation p-  
195 value  $< 10^{-4}$ ) was confirmed in the clinical stage study. Expression of *SMPDL3B* was found  
196 related to specific aptamers for ovarian tumors, such as AptaC2 and AptaC4, through molecular  
197 docking [34]. *SLC34A2* overexpression was reported related to development and progression of  
198 OC, brain cancer, and pancreatic cancer [35]. *TRAFD1* suppression was observed in ovarian,  
199 colon, brain, and renal cancers [36]. *CHD1L* overexpression was reported to augment ovarian  
200 carcinoma metastasis [15]. *FANCI* has recently been identified as a new ovarian cancer  
201 predisposing gene [37,38]. We also discovered some strong genes not been reported before to  
202 be associated with OC. For example, *ILDR1* (marginal p-value =  $2.1\times 10^{-204}$ , network-adjusted  
203 permutation p-value  $< 10^{-4}$ ) in OC occurrence study, and *TRAPPC14* (marginal p-value =  
204  $5.6\times 10^{-4}$ , network-adjusted permutation p-value =  $2\times 10^{-4}$ ), *RRP1* (marginal p-value = 0.0019,  
205 network-adjusted permutation p-value =  $6\times 10^{-4}$ ), and *ZSWIM8* (marginal p-value = 0.0045,  
206 network-adjusted permutation p-value =  $6\times 10^{-4}$ ) in 5-year survival study.

207  
208 We also identified weak genes in regulations with the strong genes, such as *PPP1CA* (marginal  
209 p-value =  $3.3\times 10^{-9}$ , network-adjusted permutation p-value  $< 10^{-4}$ ) and *HMGA1* (marginal p-value  
210 =  $1.0\times 10^{-57}$ , network-adjusted permutation p-value  $< 10^{-4}$ ) in occurrence study, *RPS8* (marginal  
211 p-value = 0.044, network-adjusted permutation p-value = 0.016), *RPL28* (marginal p-value =  
212 0.36, network-adjusted permutation p-value = 0.024), and *RPL31* (marginal p-value = 0.042,

213 network-adjusted permutation p-value = 0.18) in 5-year survival study, and *MAPKAPK5*  
214 (marginal p-value = 0.0017, network-adjusted permutation p-value <  $10^{-4}$ ) and *BYSL* (marginal  
215 p-value = 0.042, network-adjusted permutation p-value <  $10^{-4}$ ) in the clinical stage study.  
216 *PPP1CA* is a catalytic subunit gene and plays an essential role in the growth of cancer cells  
217 [39]. *HMGA1* plays a crucial role in the self-renewal and drug resistance of ovarian cancer stem  
218 cells [40]. Ribosomal genes, including *RPS8*, *RPL28*, and *RPL31*, have been recently identified  
219 as a novel therapeutic target against high-grade OC [41]. Long noncoding RNA *MAPKAPK5-*  
220 *AS1* promotes cancer cell proliferation by cis-regulating the nearby gene *MK5* [42]. *BYSL*  
221 expression was reported to be elevated and promote tumor cell growth [43].

222  
223 Several novel OC-associated weak genes that have not been reported in the literature before  
224 were identified in our study, such as *GIGYF2* (marginal p-value = 0.35, network-adjusted  
225 permutation p-value <  $10^{-4}$ ), *GNPAT* (marginal p-value = 0.21, network-adjusted permutation p-  
226 value <  $10^{-4}$ ) and *RAD54L* (marginal p-value = 0.066, network-adjusted permutation p-value <  
227  $10^{-4}$ ) in the clinical stage study.

228  
229 **Table 2** lists the top detected PGNs from each of the three studies. Many of these PGNs are  
230 overlapping with the top enriched KEGG and/or GO pathways (also see GSEA results). Genes  
231 in a KEGG/GO pathway are biologically validated to be related to systematic biology or  
232 oncology. Links between genes in a KEGG/GO pathway are lab-confirmed molecular  
233 interaction, reaction, and regulations. Overlapping between our selected PGNs and KEGG/GO  
234 pathways can serve as biological evidence of our findings. In the OC occurrence study, one of  
235 the two netLDA-detected gene networks contains overlapping genes *CLDN7* (weak), *CLDN4*  
236 (weak), *CLDN3* (strong) that are also in the *tight junction* pathway (enrichment p-value= $1.86 \times 10^{-3}$ ),  
237 *leukocyte transendothelial migration* pathway (enrichment p-value= $1.76 \times 10^{-3}$ ), and *cell*  
238 *adhesion molecules cams* pathway (enrichment p-value= $2.68 \times 10^{-3}$ ). Weak genes *TJP3* and  
239 *CRB3*, in the same network, are also overlapped in the *tight junction* pathway. The other  
240 predictive gene network selected in OC occurrence study contains two weak genes *PTTG1* and  
241 *CDC20* that are overlapping with *cell cycle* pathway (enrichment p-value= $1.85 \times 10^{-5}$ ). In the  
242 survival study, one detected predictive gene network is largely overlapped with *ribosome*  
243 pathway (enrichment p-value= $1.97 \times 10^{-30}$ ). Twenty-eight out of thirty-one genes in the network  
244 are in the *ribosome* pathway, which accounts for 31.8% of the 88 leading genes in the ribosome  
245 pathway). In the clinical stage study, multiple detected gene networks overlap with *KEGG cell*  
246 *cycle* pathway (enrichment p-value= $4.40 \times 10^{-4}$ ), *KEGG pathways in cancer* (enrichment p-



247 value= $8.12 \times 10^{-3}$ ), *GO DNA replication pathway* (enrichment p-value= $6.91 \times 10^{-9}$ ), *GO DNA*  
248 *recombination pathway* (enrichment p-value= $2.09 \times 10^{-8}$ ), and *GO chromosome segregation*  
249 *pathway* (enrichment p-value= $1.49 \times 10^{-7}$ ). Genes overlapping with *KEGG cell cycle pathway*  
250 include *MCM2* (strong), *CREBBP* (weak), *ABL1* (weak), *PLK1* (weak), *MCM4* (weak), *MCM6*  
251 (weak), *BUB1* (weak), *CDC20* (weak), *CCNB1* (weak), *ORC3* (weak), *SMAD2* (weak), *GSK3B*  
252 (weak), and *PCNA* (weak). Genes overlapping with *KEGG pathways in cancer* include *PTGS2*  
253 (strong), *KRAS* (strong), *WNT6* (strong), *ABL1* (weak), *MTOR* (weak), *SMAD2* (weak), *STK4*  
254 (weak), *CREBBP* (weak), *MSH3* (weak), *RXR* (weak), and *GSK3B* (weak). Genes overlapping  
255 with *GO DNA replication pathway* include *PRIM1* (strong), *MCM6* (weak), *DDX23* (weak), and  
256 *WDHD1* (weak). Genes overlapping with *GO DNA recombination pathway* include *MCM2*  
257 (strong), *MCM4* (weak), *HMCES* (weak), and *RUVBL1* (weak). Genes overlapping with *GO*  
258 *chromosome segregation pathway* include *BUB1* (weak), *PRC1* (weak), *KIF2C* (weak), *CDC20*  
259 (weak), *PLK1* (weak), and *RMI2* (weak).

260  
261 **Prediction performance comparison with competing ML methods.** ROC curves in each  
262 study are depicted in **Figure 5**. In the occurrence study, all methods gave almost perfect  
263 prediction results – area under the ROC curve (AUC) equaling 1 – as all top genes (strong and  
264 weak) have much significant differentiating effects compared to top genes in the survival and  
265 clinical stage studies. In the survival study, netLDA gave an AUC = 0.91, much higher than using  
266 only the strong genes and Lasso/Ridge/elasticNet (0.85-0.87). XGboosting gave a comparable  
267 AUC of 0.90. In the clinical stage study, netLDA also gave the highest AUC = 0.65, XGboosting  
268 gave an AUC = 0.61, and Lasso/Ridge/elasticNet and LDA using only the strong genes gave an  
269 AUC around 0.5, similar to a random guess.

270  
271 **KM analysis.** **Figure 6** shows the Kepler-Meijer curves and log-rank test results in the 5-year  
272 survival study. **Figure 6 (a)** is for the KM curves and log-rank test between the two netLDA  
273 predicted groups using both selected strong/weak genes, and PGN structures. **Figure 6 (b-d)**  
274 are KM curves and log-rank tests between high- and low-expression (above and below the  
275 median expression value) groups of top three selected strong genes. The two KM curves were  
276 more separated, and the log-rank test p-value were more significant between the netLDA  
277 predicted groups than those between the expression level groups from a single strong gene,  
278 demonstrating the effects of weak genes and PGNs] in improving the classification results.

279

280 **GSEA. Figure 7** shows KEGG and GO pathway enrichment analysis results. The left panels are  
281 examples of the top enriched KEGG pathways for each of the three studies. Tight junction  
282 pathway was enriched in the OC occurrence study (enrichment p-value =  $1.86 \times 10^{-3}$ ), ribosome  
283 pathway was enriched in the 5-year survival study (enrichment p-value =  $1.97 \times 10^{-30}$ ), cell cycle  
284 pathway was enriched in the clinical stage study (enrichment p-value =  $4.40 \times 10^{-4}$ ). Many of the  
285 weak genes (highlighted in yellow) overlap with these top enriched pathways, confirming that  
286 the weak genes play a biological role in the development and progression of OC. A complete list  
287 of enriched KEGG pathways is given in the appendix. The right panels in **Figure 7** list the top  
288 enriched GO pathways for each study. Top GO pathways enriched in the occurrence study  
289 include cell-cell junction organization (enrichment p-value =  $4.26 \times 10^{-10}$ ), tight junction assembly  
290 pathway (enrichment p-value =  $3.55 \times 10^{-9}$ ), and epidermis development pathway (enrichment p-  
291 value =  $7.00 \times 10^{-9}$ ). Top GO pathways enriched in the survival study include SRP-dependent  
292 cotranslational protein targeting to membrane (enrichment p-value =  $2.54 \times 10^{-55}$ ) and nuclear-  
293 transcribed mRNA catabolic process (enrichment p-value =  $2.16 \times 10^{-53}$ ). Top GO pathways  
294 enriched in the clinical stage study include DNA replication (enrichment p-value =  $6.91 \times 10^{-9}$ )  
295 and recombinational repair (enrichment p-value =  $1.59 \times 10^{-7}$ ). **Table 3** lists the top enriched  
296 KEGG pathways. Lists of top enriched GO pathways are provided in the Supplemental  
297 Materials.

298  
299 **Cellular mapping for the selected genes using scRNAseq data. Figure 8** shows the cellular  
300 distribution of the GSE229343 scRNAseq data and the expression maps of the selected feature  
301 genes. In **Figure 8 (a)**, Seurat was first used to identify 28 cell subtype clusters using resolution  
302 = 0.2. For OC occurrence study, many genes are expressed on epithelial cells (including strong  
303 genes: *CLDN3*, *SLC34A2*, *SMIM22*, *FOLR1*, and weak genes: *CLDN7*, *MAL2*, *SPRINT1*,  
304 *PRSS8*, *EHF*, *ELF3*, *KRT8*, *SLPI*, *KRT18*, *EPCAM*, *VAMP8*, *KRT7*, *CLDN4*, *WFDC2*, *CD24*,  
305 *MSLN*); on fore/mid/hindgut epithelial cells (including strong genes: *CLDN3*, *SMIM22*, and weak  
306 genes: *CLDN7*, *MAL2*, *SPINT1*, *PRSS8*, *ELF3*, *KRT8*, *SLPI*, *KRT18*, *EPCAM*, *KRT7*, *CLDN4*);  
307 on cycling neural program/mesenchymal stem cells (including weak genes: *UBE2C*, *CDC20*,  
308 *PTTG1*, *UBE2T*); on airway/retinal epi/ciliated cells (including strong genes: *CLDN3*, *SMIM22*,  
309 *FOLR1*, and weak genes: *ELF3*, *KRT8*, *UCP2*, *SLPI*, *EPCAM*, *KRT7*, *CLDN4*, *WFDC2*, *CD24*);  
310 on myeloid/T cells (including weak genes: *UCP2*, *VAMP8*); and on immature neuron cells  
311 (including weak gene *CD24*). For the clinical stage study, many genes are overexpressed on  
312 cycling neural program/Mesenchymal stem cells (including weak genes: *CDC20*, *UBE2T*,  
313 *NUSAP1*, *CCNB1*, *PLK1*, *ASPM*, *PRC1*, *KIF20A*); on immature neuron cells (including strong

314 gene TUBB2B); and on myeloid cells (including weak gene CD163). For the survival study, as  
315 there were very few genes mapped to the scRNAseq GSE229343 gene set, we did not observe  
316 a particular cellular express pattern for the selected genes.

317

## 318 **Summary and Discussion**

319 We confirmed previously identified prognostic genes such as *EPCAM*, *UBE2C*, *CHD1L*, *TP53*<sup>1</sup>  
320 *CD24* [53], *WFDC2* [53], and *FANCI* associated with OC occurrence, survival, or clinical stage.

321 We identified novel susceptibility strong genes including: *ILDR1* in occurrence study,  
322 *TRAPPC14*, *RRP1*, and *ZSWIM8* in the survival study, as well as novel coregulating weak  
323 genes including *GIGYF2*, *GNPAT*, *RAD54L*, and *ELL* in the clinical stage study. Our identified  
324 gene networks overlapped with KEGG *tight junction*, *leukocyte transendothelial migration*, and  
325 *cell cycle* pathways in the occurrence study; with *ribosome* pathway in the survival study; and  
326 with *cell cycle* pathway and *pathways in cancer* in the clinical stage study. We found many  
327 identified genes particularly expressed on epithelial cells in the occurrence study and on cycling  
328 neural program/Mesenchymal stem cells in the clinical stage study. By incorporating gene  
329 network structures and weak genes, netLDA significantly improves the prediction performance  
330 compared to other ML/DL methods such as Lasso, Ridge, elasticNet, XGboost, and LDA with  
331 only strong genes.

332

333 A major contribution of this work is the identification of prognostic oncogenes, especially weak  
334 genes in the OC related pathways. The *CLDN* genes (*CLDN7* and *CLDN4* detected in the OC  
335 occurrence study) in the *tight junction* pathway and *cell adhesion molecules cams* pathway,  
336 which functioning as one of the protective barriers in the epithelial and endothelial cells, were  
337 also observed to overexpress on fore/mid/hindgut epithelial cells in the single cell analysis. The  
338 weak genes detected in the survival study, mainly ribosomal genes, such as *RPS8* and *RPL28*,  
339 overlapping with *ribosome* pathway, which was known to promote protein homeostasis in  
340 cancers by fine-tuning protein synthesis and preventing toxic protein aggregation [102]. The  
341 *CCN* gene family (*CCNB1* detected in the clinical stage study) and *CDK* genes (*CDK2* within the  
342 detected network indexed by *PRIM1* in clinical stage study, see **Table 2**, even though it is not in  
343 the final selected weak gene set) are coregulating genes in the *cell cycle* pathway. These  
344 regulating weak genes were not reported in the literature, as they were difficult to detect by  
345 themselves.

346

347 Although netLDA incorporates gene coregulation network structures into calculating gene  
348 differential expressions, it assumes the same network structures (topology, coregulation  
349 direction and strength, etc.) between different outcome groups. In real applications, the network  
350 structures can be different between groups, in which case a quadratic discriminant analysis  
351 might be a better approach. However, accurate and robust inference of different network  
352 structures requires large sample sizes per group. Moreover, gene coregulations are usually  
353 more stable and robust compared to individual gene expression levels. That is, even individual  
354 gene expression levels can vary a lot between different disease groups, cell types, and  
355 environments, but the gene-gene coregulation maintains rather stable across the  
356 heterogeneous situations. Such robustness in gene networks is critical for assembling a  
357 dynamic biology system. Essentially, the network structures inferred by netLDA are the average  
358 of different groups when the same network structure assumption is violated.

359  
360 Most of the weak genes selected in the OC occurrence study also have strong marginal DE  
361 effects. In that sense, they may also be considered as strong genes. The prediction  
362 performance is dominated by the top strong genes; therefore, the prediction performance  
363 (**Figure 5**) was not much different between netLDA and LDA using only strong genes and other  
364 competing methods. The predictive effects of weak genes were manifested in the survival and  
365 clinical stage studies, where the marginal DE differential effects of genes are much weaker than  
366 that in the occurrence study (**Figure 3** and **Figure 5**). Especially in the clinical stage study, as  
367 the strong genes only explained a small portion of the outcome variation on the training data,  
368 netLDA dug deeper with more weak genes residing in more predictive networks compared to  
369 the occurrence and survival study, in order to accumulate sufficient information to optimize the  
370 prediction accuracy on the test data.

371  
372 The selected gene sets from the occurrence, survival, and stage studies are non-overlapping.  
373 This is mainly because the input gene sets are different for the three studies. Moreover, it also  
374 reveals that the OC development and progression may have different underlying molecular  
375 mechanisms.

376  
377 Since gene expressions in bulk RNAseq data are averaged expressions over different types of  
378 cells, DE effects of some genes might be washed out in the averaging. For example, a gene  
379 that is significantly differentially expressed only on a particular cell type but not on other cell  
380 types might exhibit only a marginally weak DE effect. A gene differentially expressed on two cell

381 types but in different directions will show no marginal DE effect due to signal cancellation. The  
382 netLDA is a desired method for detecting such genes. It would be an optimal validation  
383 approach to confirm the DE effects of the selected genes using scRNAseq data from both  
384 cohorts. Our feature mapping of the selected genes using scRNAseq data helped identify which  
385 types of cells the genes are particularly expressed on. Investigators are recommended to  
386 conduct DE analyses using scRNAseq data on the identified cell types to further validate the  
387 findings.

388

389

### 390 **Abbreviations**

|     |          |                                         |
|-----|----------|-----------------------------------------|
| 391 | DE       | Differentially expressed                |
| 392 | GEO      | Gene Expression Omnibus                 |
| 393 | GO       | GeneOntology                            |
| 394 | GSEA     | Gene set enrichment analysis            |
| 395 | GTEX     | The Genotype-Tissue Expression project  |
| 396 | KEGG     | Kyoto Encyclopedia of Genes and Genomes |
| 397 | KM       | Kepler-Meijer                           |
| 398 | LDA      | Linear discriminant analysis            |
| 399 | OC       | Ovarian cancer                          |
| 400 | PGN      | Predictive gene networks                |
| 401 | RNAseq   | RNA sequencing                          |
| 402 | scRNAseq | single cell RNA sequencing              |
| 403 | TCGA     | The Cancer Genome Atlas                 |

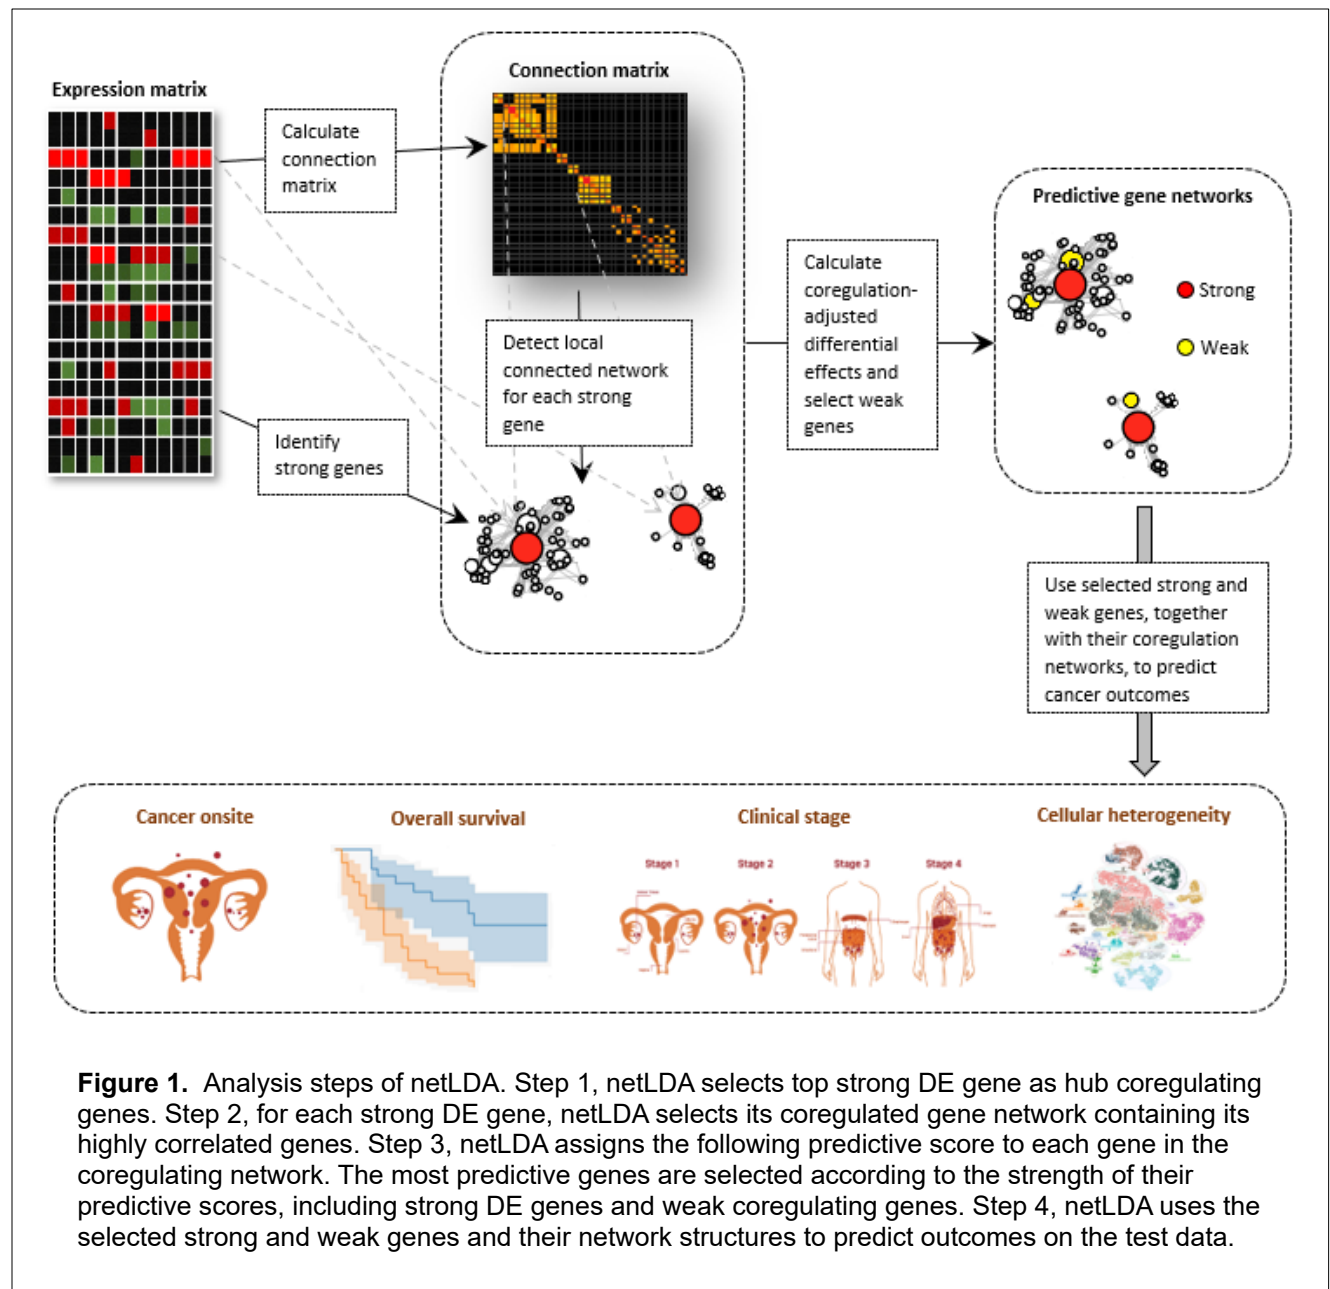

404

405

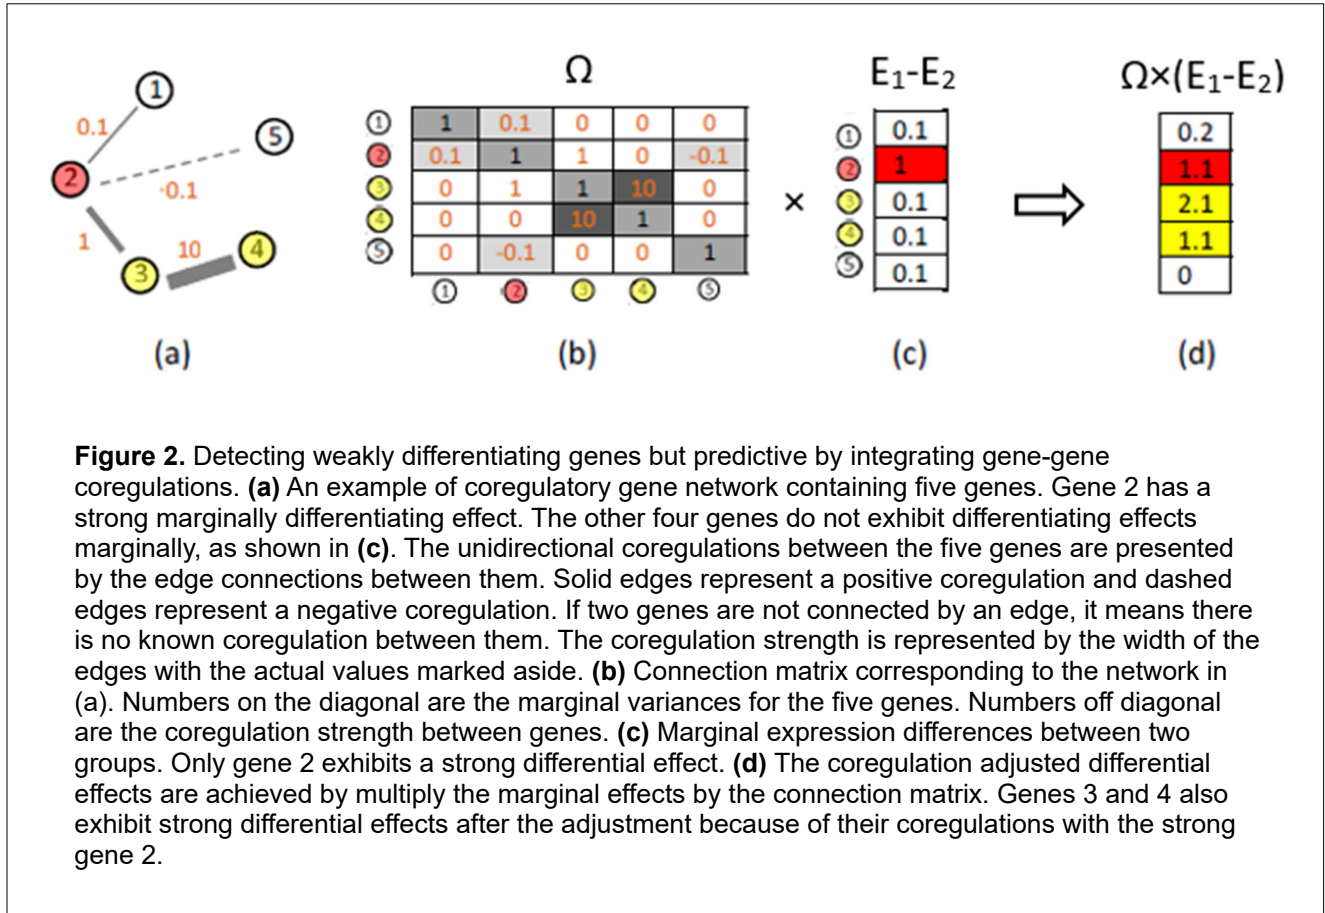

**Figure 2.** Detecting weakly differentiating genes but predictive by integrating gene-gene coregulations. **(a)** An example of coregulatory gene network containing five genes. Gene 2 has a strong marginally differentiating effect. The other four genes do not exhibit differentiating effects marginally, as shown in **(c)**. The unidirectional coregulations between the five genes are presented by the edge connections between them. Solid edges represent a positive coregulation and dashed edges represent a negative coregulation. If two genes are not connected by an edge, it means there is no known coregulation between them. The coregulation strength is represented by the width of the edges with the actual values marked aside. **(b)** Connection matrix corresponding to the network in **(a)**. Numbers on the diagonal are the marginal variances for the five genes. Numbers off diagonal are the coregulation strength between genes. **(c)** Marginal expression differences between two groups. Only gene 2 exhibits a strong differential effect. **(d)** The coregulation adjusted differential effects are achieved by multiply the marginal effects by the connection matrix. Genes 3 and 4 also exhibit strong differential effects after the adjustment because of their coregulations with the strong gene 2.

406

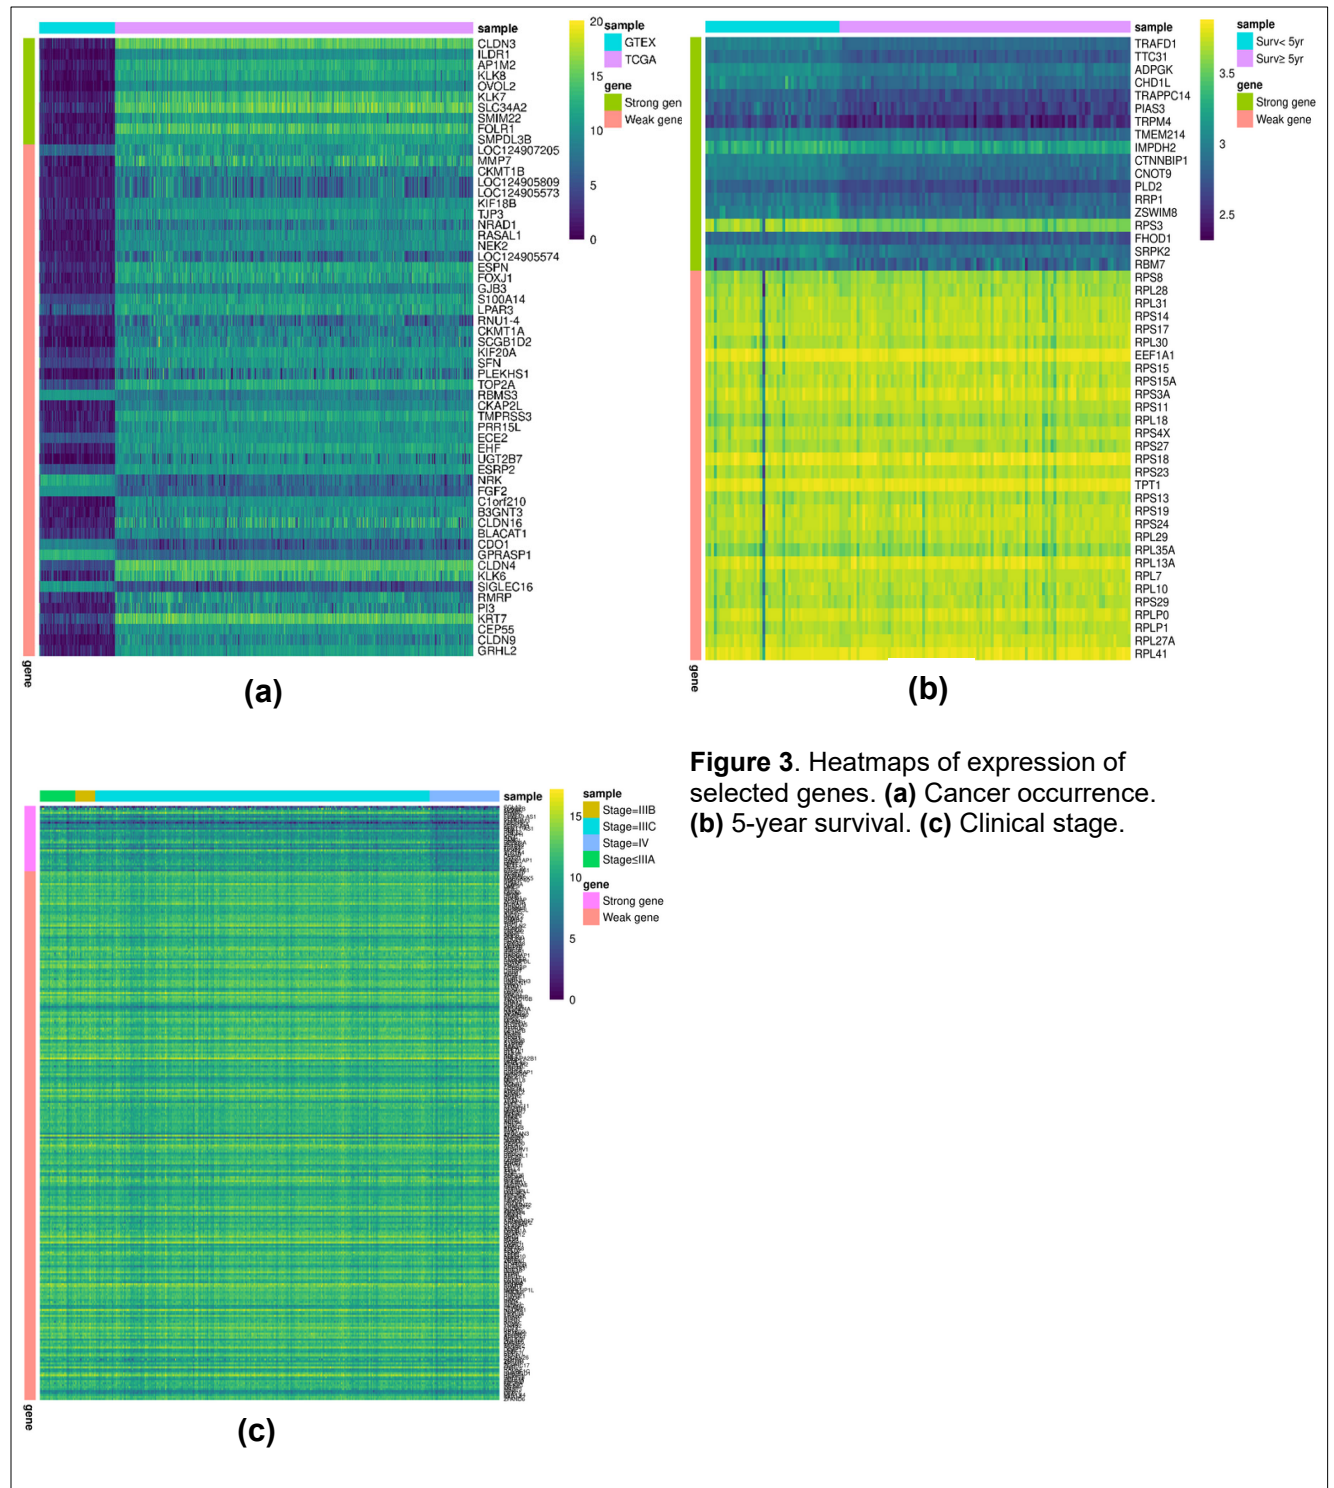

**Figure 3.** Heatmaps of expression of selected genes. **(a)** Cancer occurrence. **(b)** 5-year survival. **(c)** Clinical stage.

407  
408



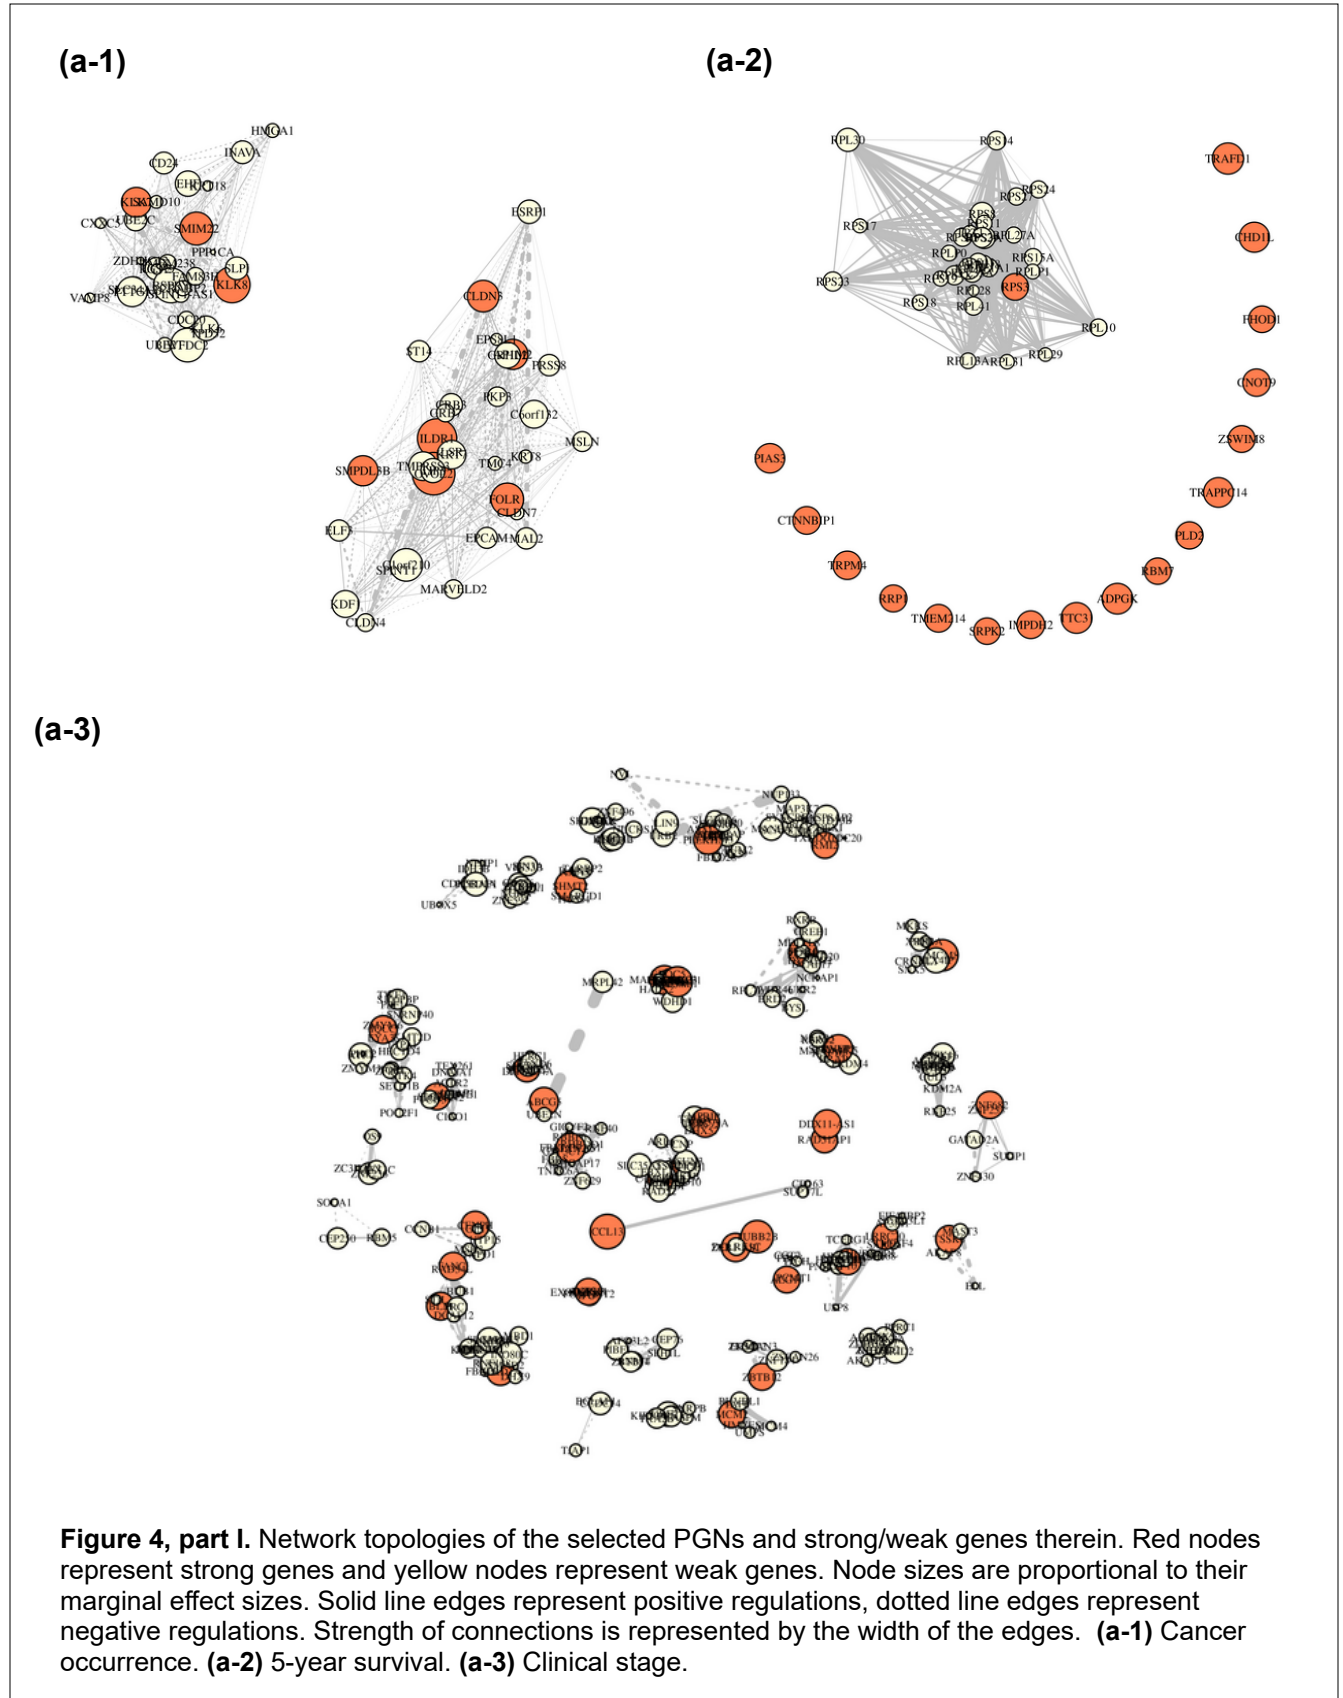

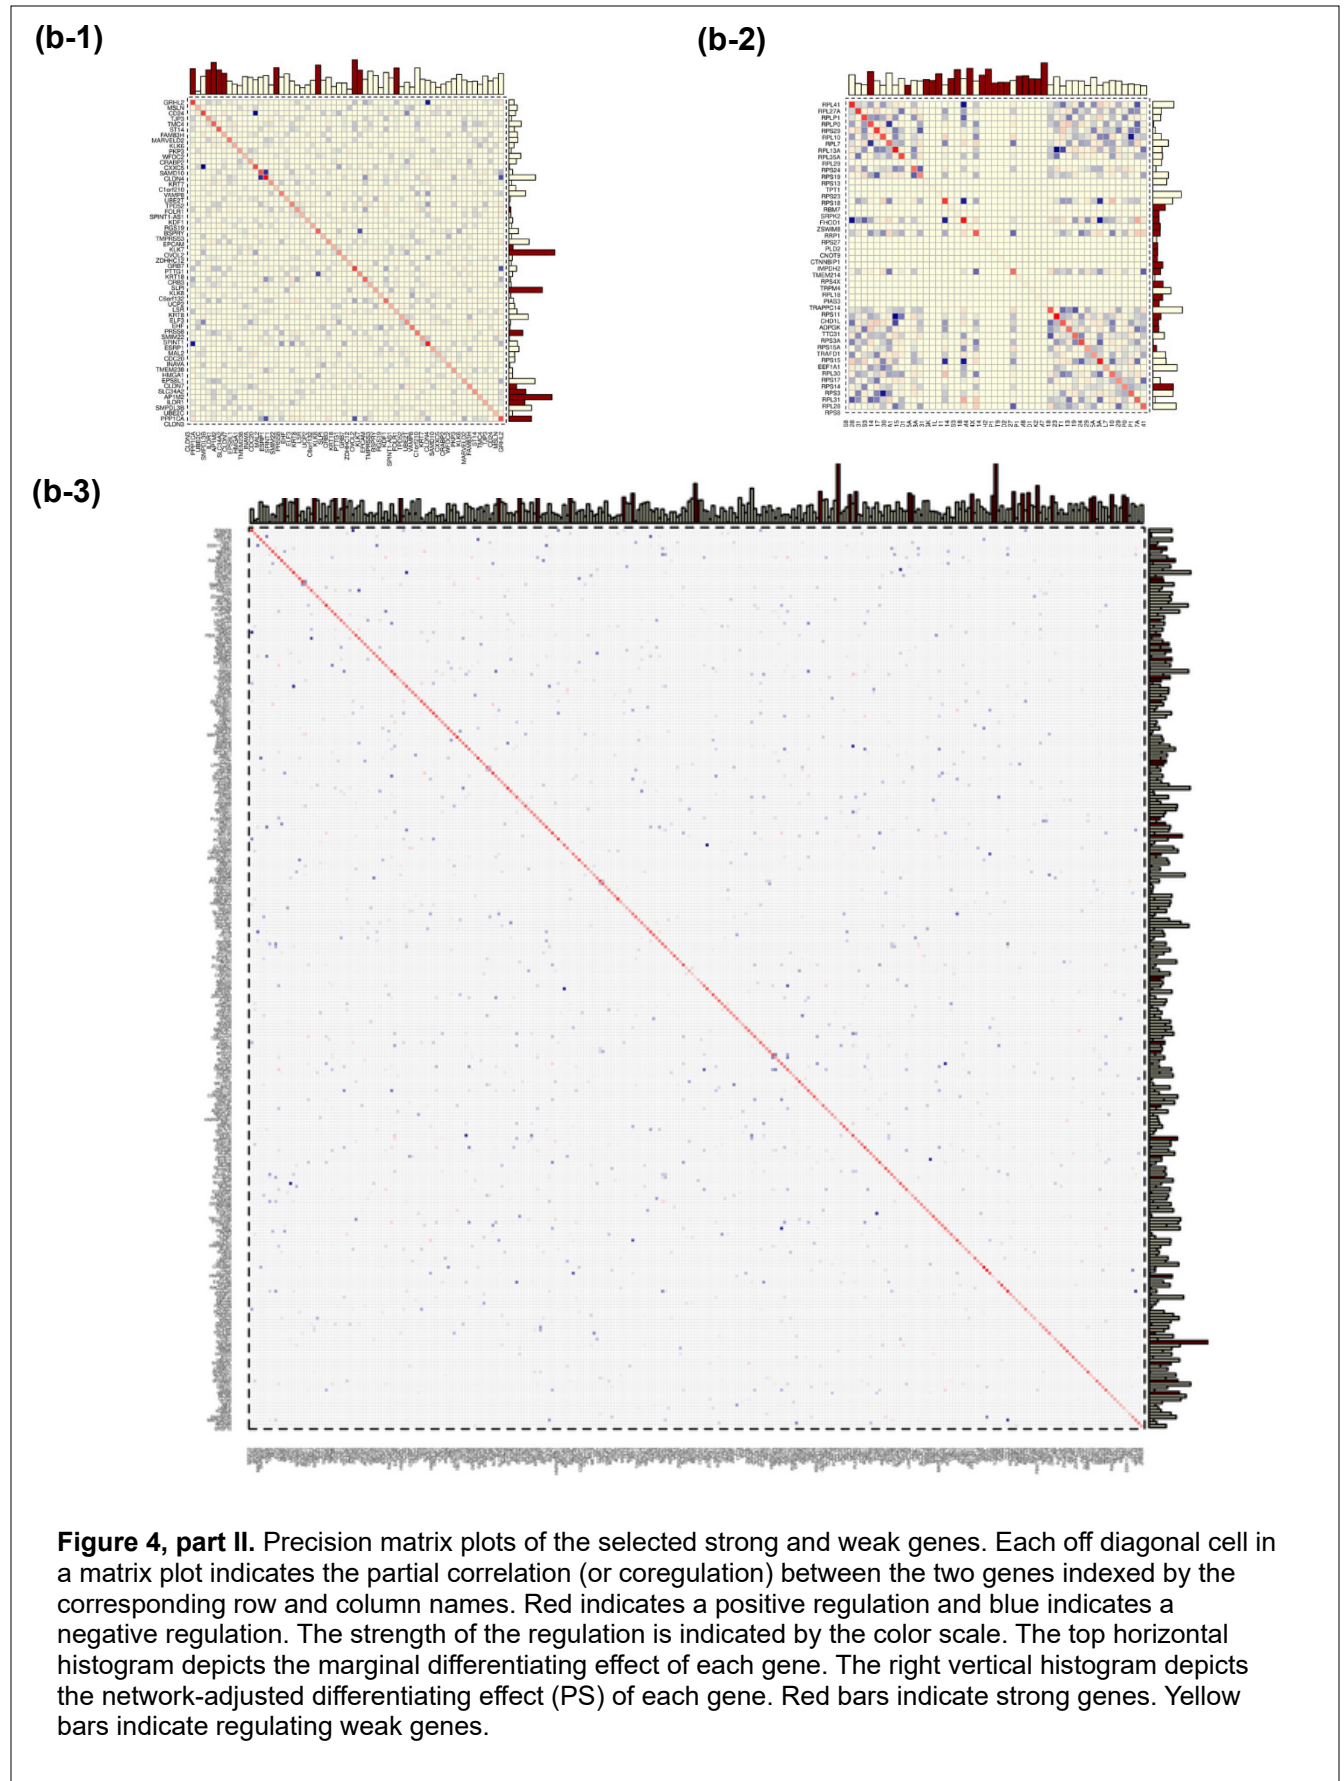

411

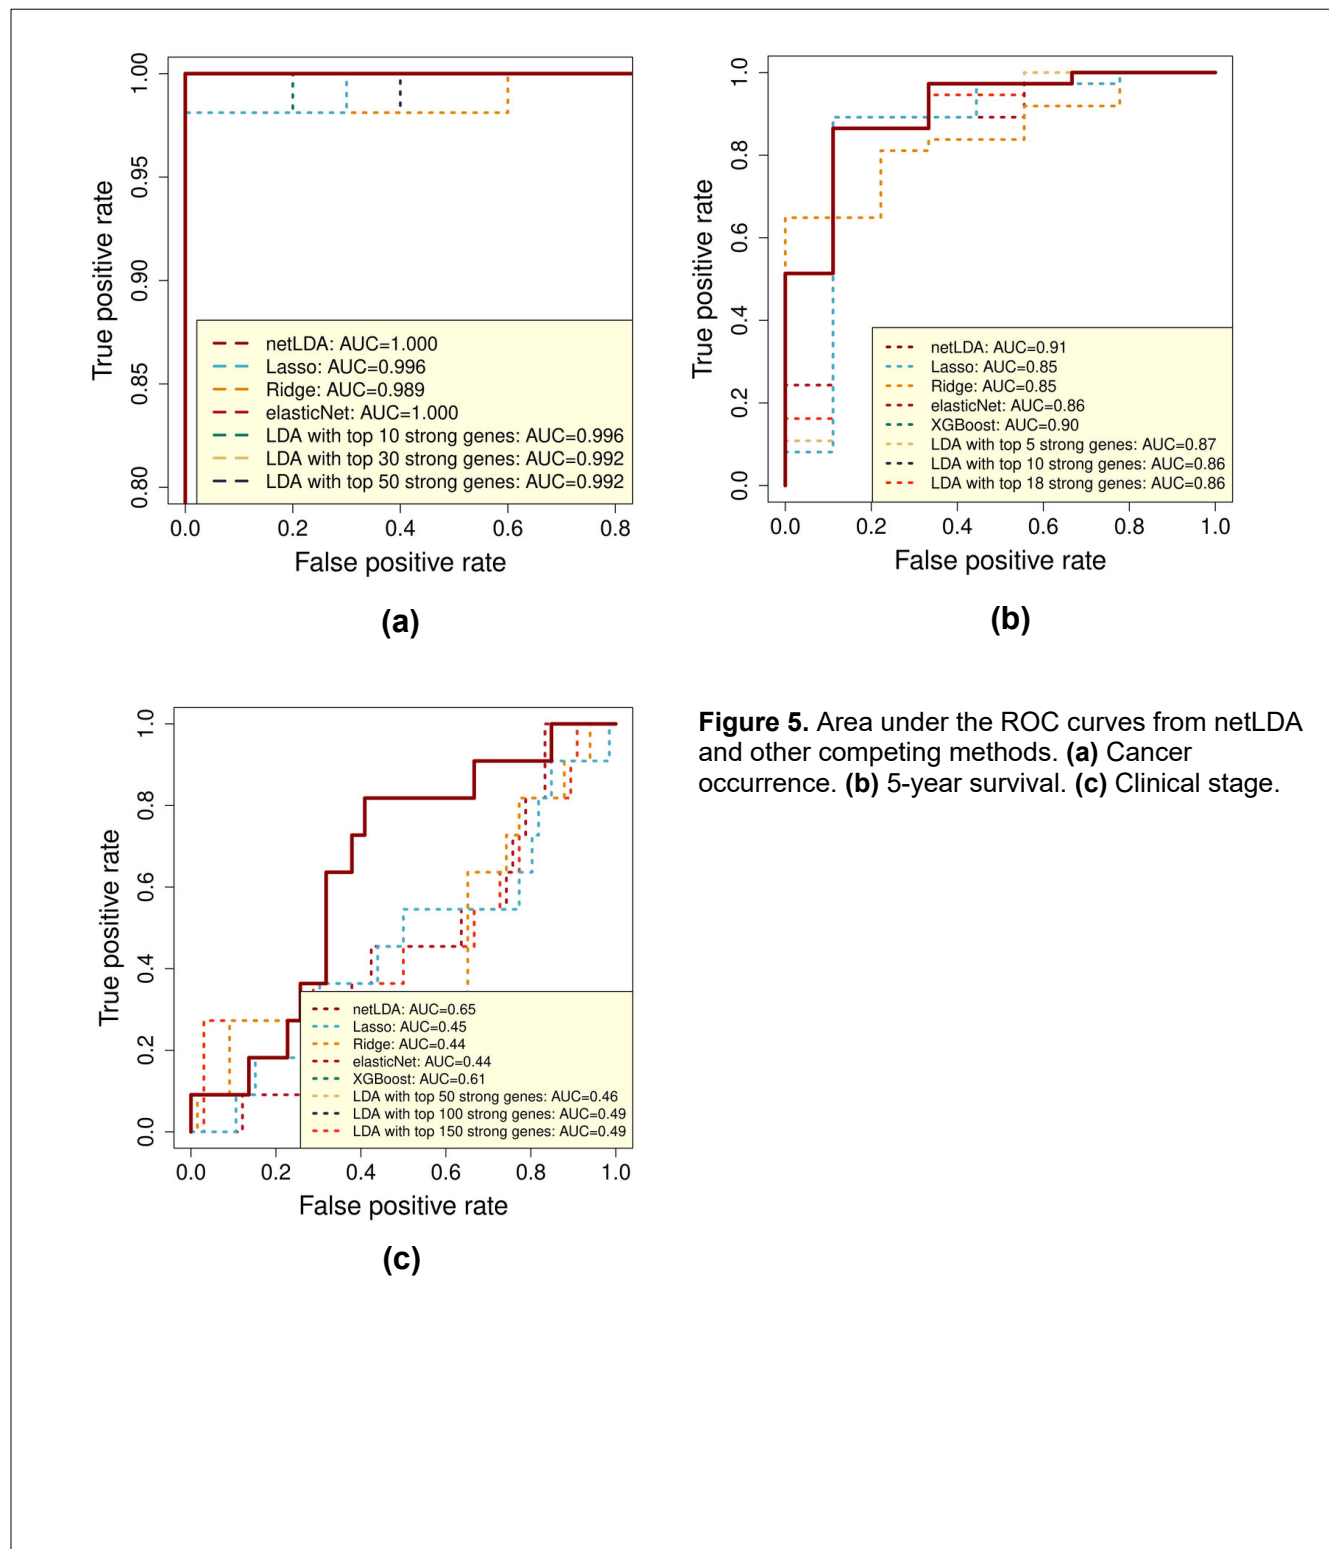

412

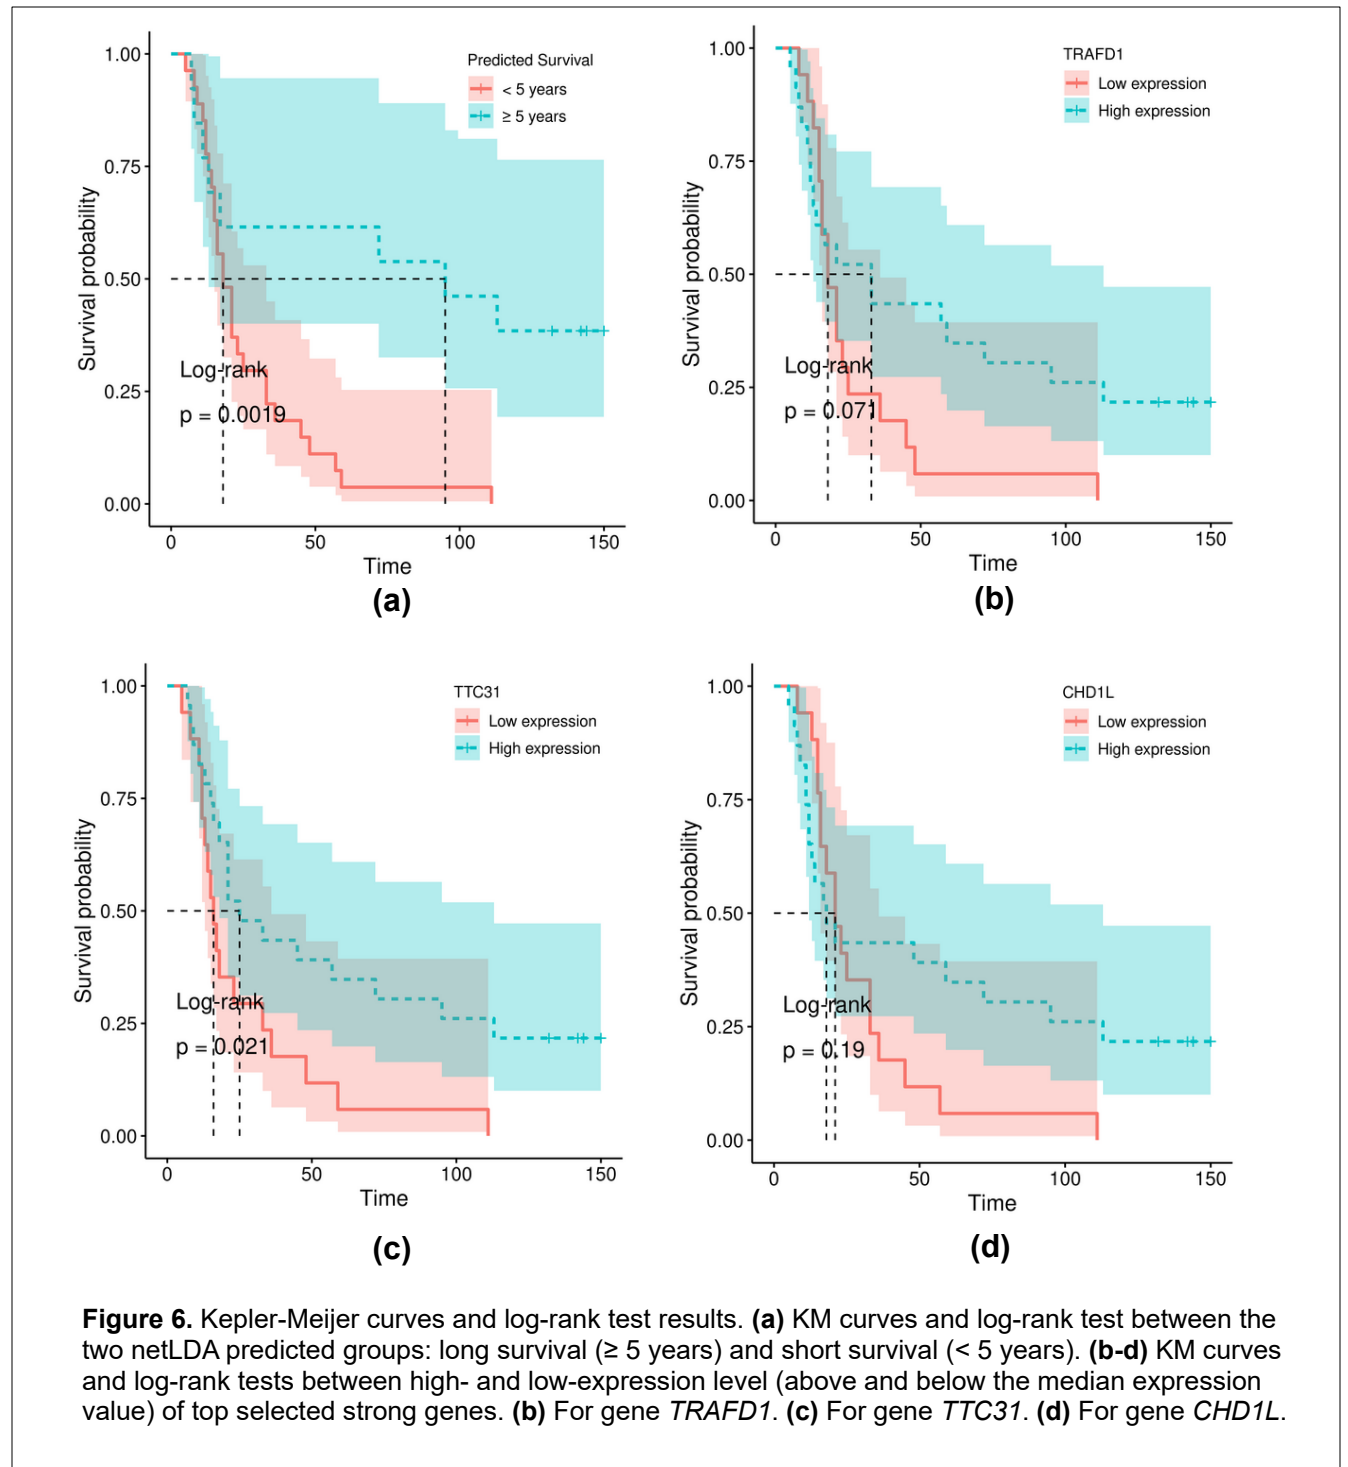

413

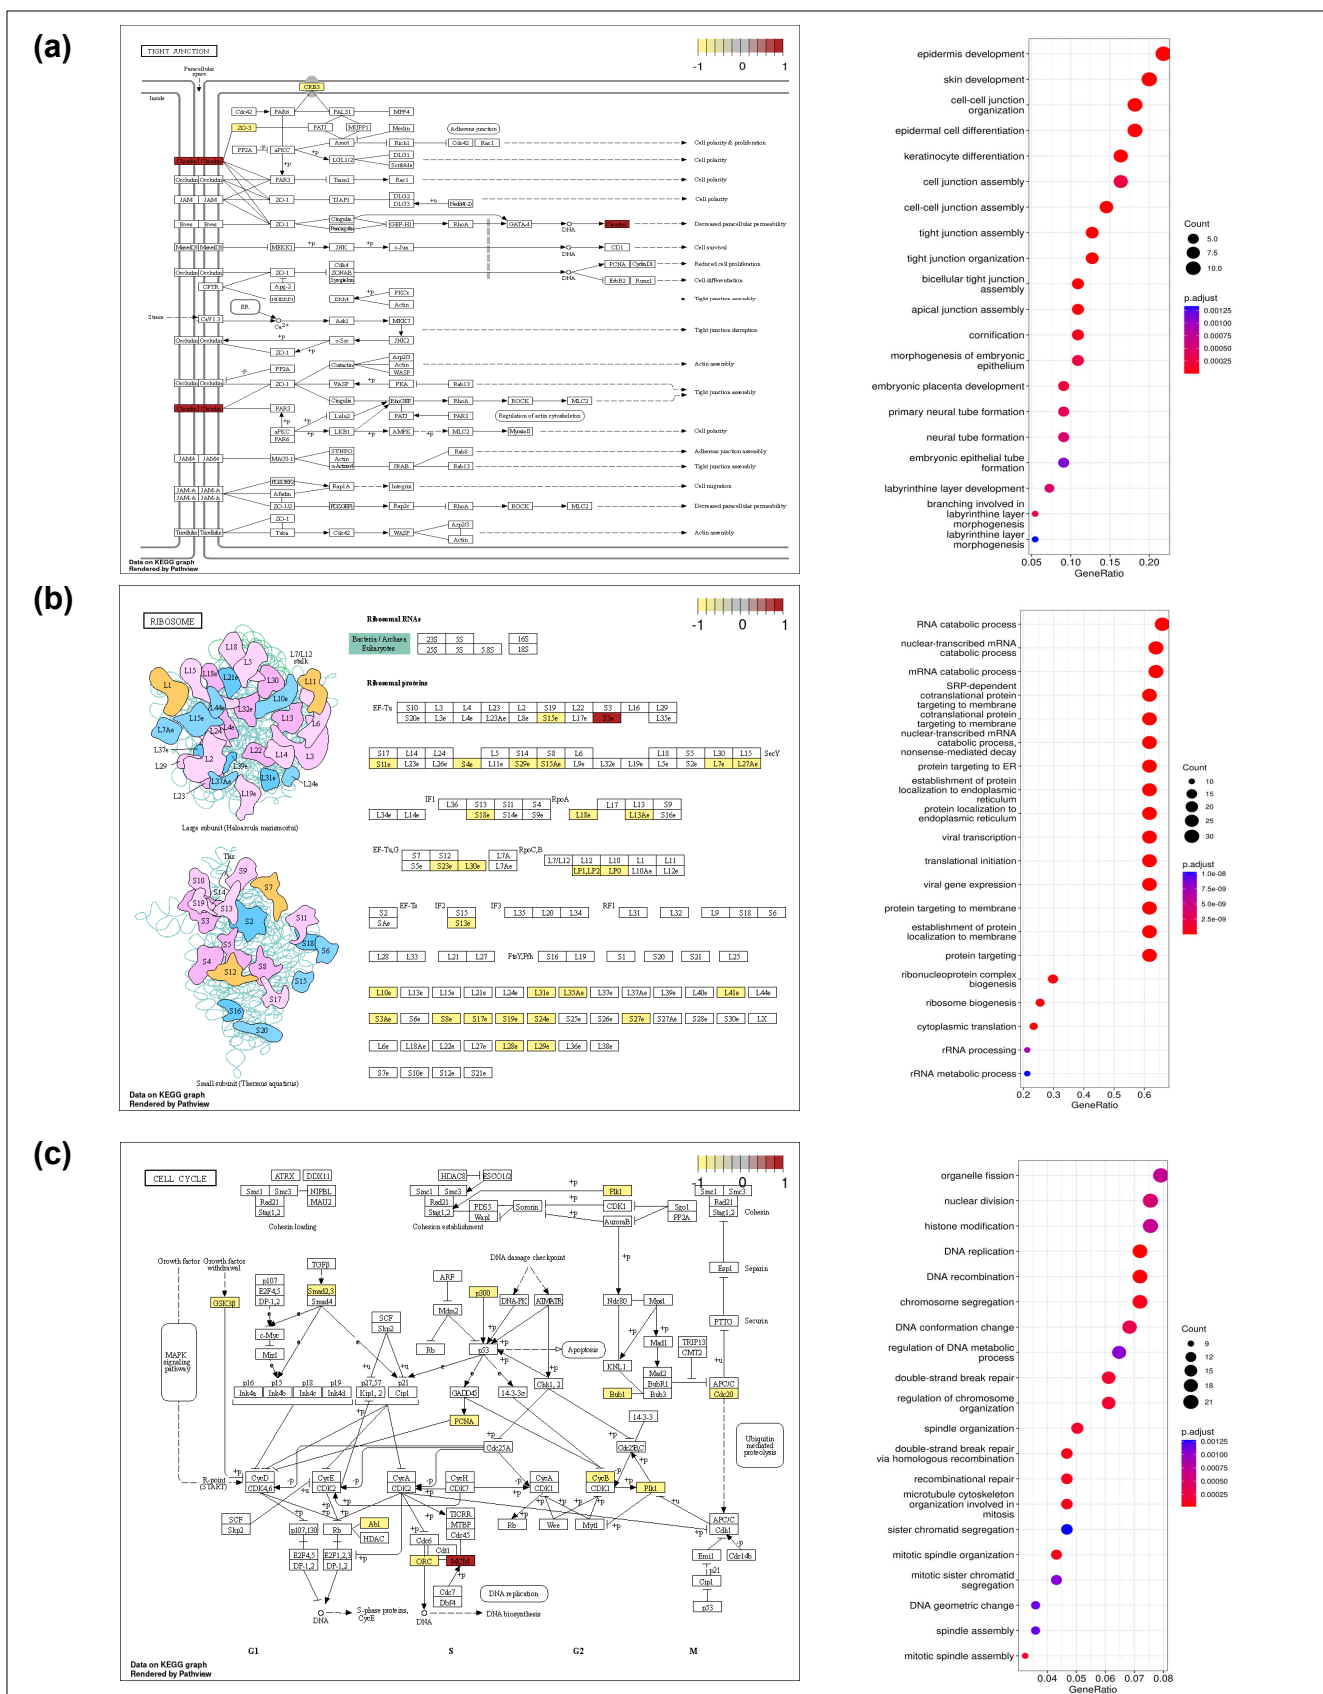

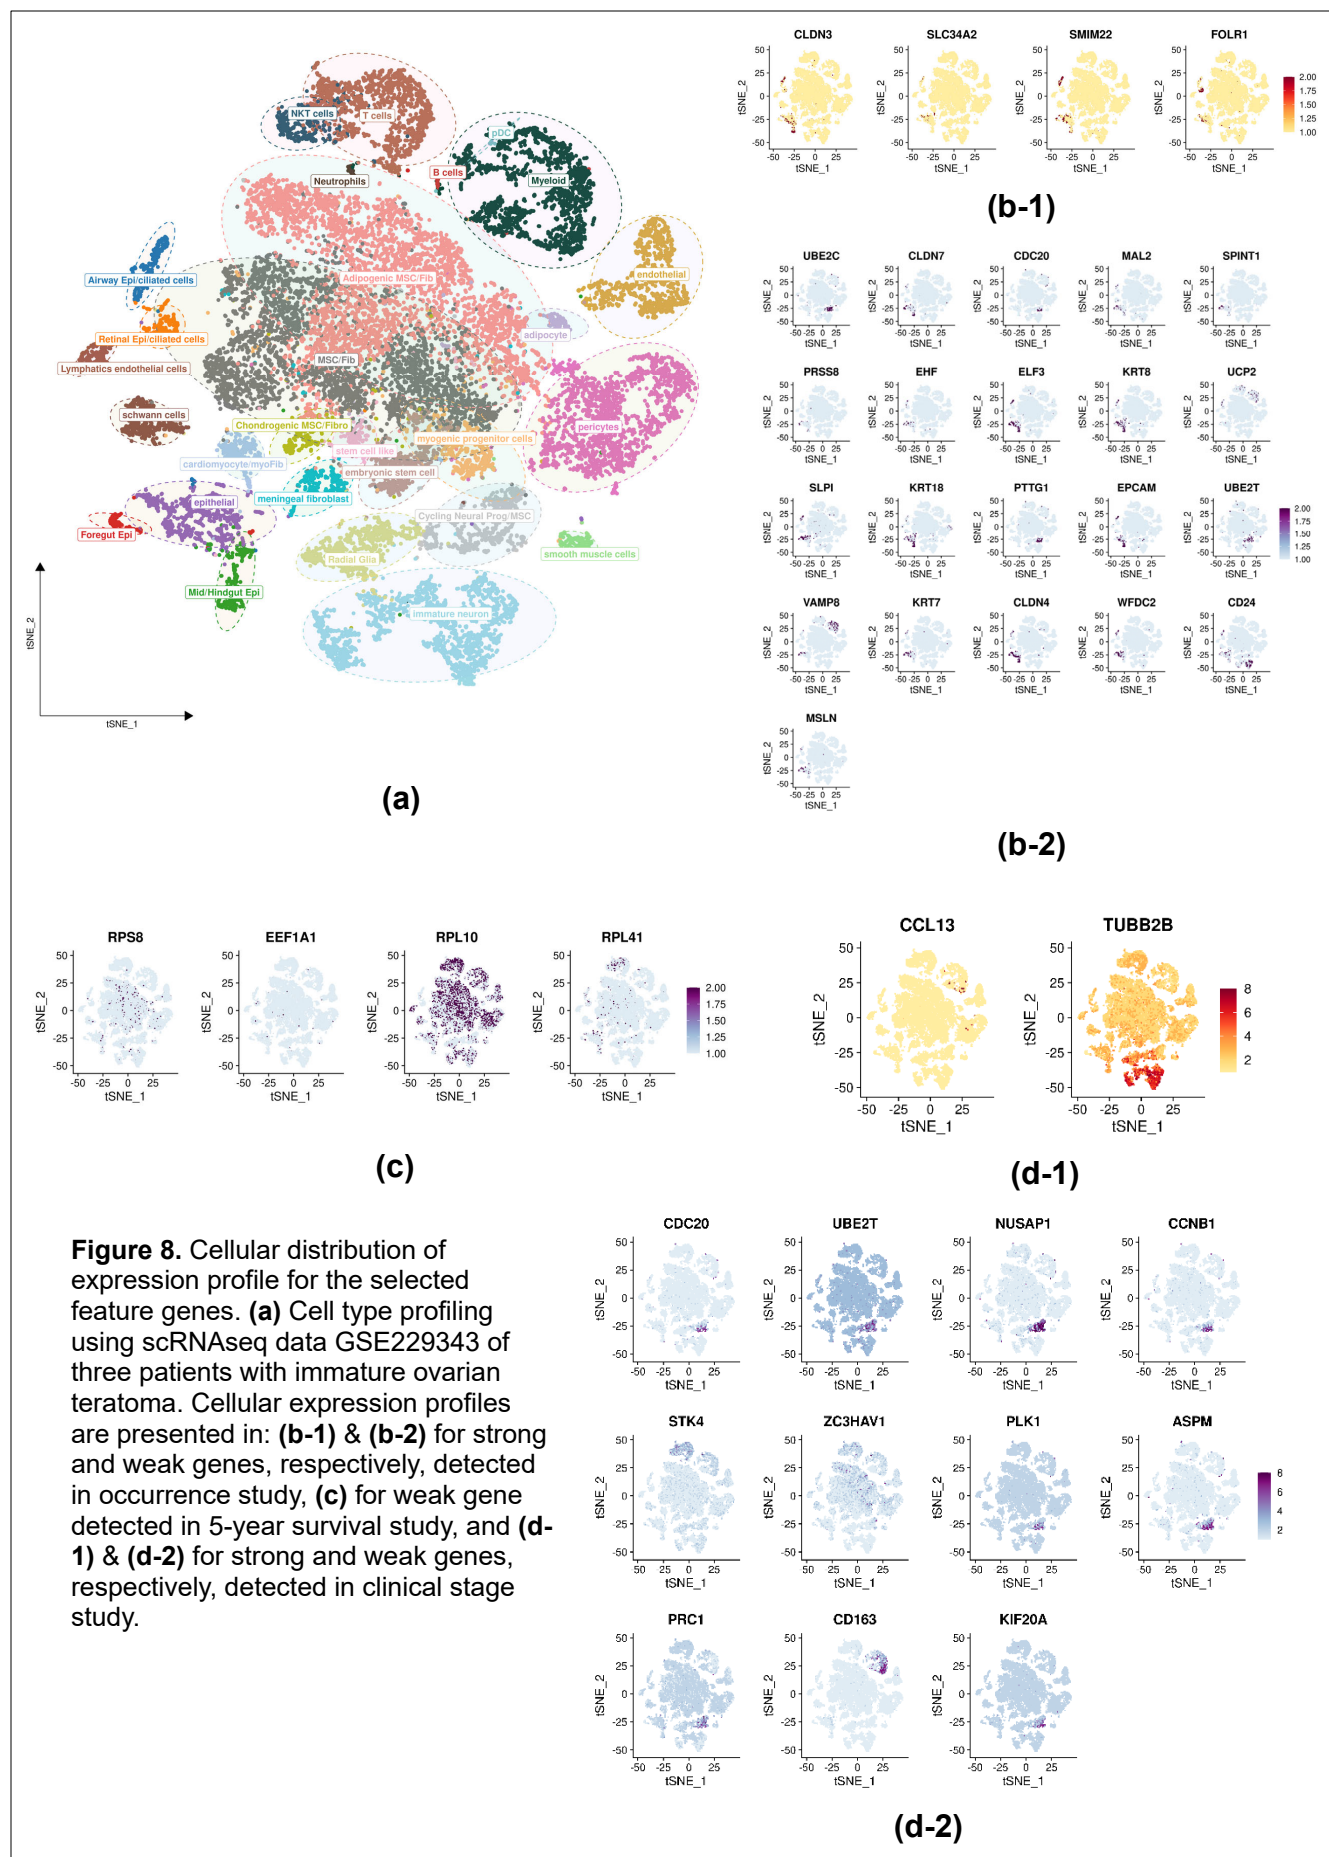

**Figure 8.** Cellular distribution of expression profile for the selected feature genes. **(a)** Cell type profiling using scRNAseq data GSE229343 of three patients with immature ovarian teratoma. Cellular expression profiles are presented in: **(b-1)** & **(b-2)** for strong and weak genes, respectively, detected in occurrence study, **(c)** for weak gene detected in 5-year survival study, and **(d-1)** & **(d-2)** for strong and weak genes, respectively, detected in clinical stage study.

**Table 1. Top selected genes**

| Gene name                                      | Gene type | Network-adjusted DE | Permutation p-value for network-adjusted DE <sup>†</sup> | Marginal DE | Marginal p-value <sup>‡</sup> | Literature on selected gene |
|------------------------------------------------|-----------|---------------------|----------------------------------------------------------|-------------|-------------------------------|-----------------------------|
| <b>Cancer occurrence prediction</b>            |           |                     |                                                          |             |                               |                             |
| <i>BRCA2</i> **                                | strong    | --                  | <0.0001*                                                 | 1.19        | <2.2×10 <sup>-16</sup>        | 5-8                         |
| <i>BRCA1</i> **                                | strong    | --                  | <0.0001*                                                 | 1.11        | <2.2×10 <sup>-16</sup>        | 5-7                         |
| <i>PPP1CA</i>                                  | weak      | -0.98               | <0.0001*                                                 | 2.21        | 3.3×10 <sup>-9</sup>          | 39                          |
| <i>UBE2C</i>                                   | weak      | 0.81                | <0.0001*                                                 | 2.46        | 3.0×10 <sup>-134</sup>        | 44-46                       |
| <i>SMPDL3B</i>                                 | strong    | 0.72                | <0.0001*                                                 | 2.50        | 8.8×10 <sup>-182</sup>        | 47                          |
| <i>ILDR1</i>                                   | strong    | 0.71                | <0.0001*                                                 | 2.50        | 2.1×10 <sup>-204</sup>        |                             |
| <i>SLC34A2</i>                                 | strong    | 0.61                | <0.0001*                                                 | 2.43        | 1.4×10 <sup>-190</sup>        | 48                          |
| <i>CLDN7</i>                                   | weak      | -0.56               | <0.0001*                                                 | 2.45        | 8.5×10 <sup>-96</sup>         | 30                          |
| <i>EPS8L1</i>                                  | weak      | -0.52               | <0.0001*                                                 | 2.35        | 2.2×10 <sup>-60</sup>         | 49                          |
| <i>HMGA1</i>                                   | weak      | 0.51                | <0.0001*                                                 | 2.44        | 1.0×10 <sup>-57</sup>         | 50, 51                      |
| <i>TMEM238</i>                                 | weak      | 0.49                | <0.0001*                                                 | 2.43        | 1.1×10 <sup>-116</sup>        | 52                          |
| <i>INAVA</i>                                   | weak      | 0.46                | <0.0001*                                                 | 1.41        | 4.2×10 <sup>-125</sup>        | 53                          |
| <i>CDC20</i>                                   | weak      | 0.43                | <0.0001*                                                 | -0.44       | 1.3×10 <sup>-101</sup>        | 54                          |
| <i>SPINT1</i>                                  | weak      | -0.38               | <0.0001*                                                 | 4.43        | 6.7×10 <sup>-60</sup>         | 55                          |
| <i>SMIM22</i>                                  | strong    | 0.35                | <0.0001*                                                 | 0.87        | 1.2×10 <sup>-184</sup>        | 56                          |
| <b>5-year survival prediction</b>              |           |                     |                                                          |             |                               |                             |
| <i>TRAFD1</i>                                  | strong    | -0.64               | <0.0001*                                                 | -0.64       | 0.0013                        | 57                          |
| <i>ADPGK</i>                                   | strong    | -0.63               | <0.0001*                                                 | -0.63       | 6.4×10 <sup>-5</sup>          | 58                          |
| <i>CHD1L</i>                                   | strong    | -0.61               | <0.0001*                                                 | -0.61       | 0.0021                        | 59-62                       |
| <i>PIAS3</i>                                   | strong    | -0.60               | <0.0001*                                                 | -0.60       | 0.0018                        | 63                          |
| <i>TTC31</i>                                   | strong    | -0.63               | 0.0002*                                                  | -0.63       | 1.8×10 <sup>-4</sup>          | 64                          |
| <i>TRAPPC14</i>                                | strong    | -0.61               | 0.0002*                                                  | -0.61       | 5.6×10 <sup>-4</sup>          |                             |
| <i>TRPM4</i>                                   | strong    | -0.58               | 0.0003*                                                  | -0.58       | 0.0014                        | 65                          |
| <i>TMEM214</i>                                 | strong    | -0.56               | 0.0004*                                                  | -0.56       | 0.0013                        | 66                          |
| <i>IMPDH2</i>                                  | strong    | 0.56                | 0.0004*                                                  | 0.56        | 0.0043                        | 67                          |
| <i>CNOT9</i>                                   | strong    | -0.56               | 0.0005*                                                  | -0.56       | 2.6×10 <sup>-4</sup>          |                             |
| <i>PLD2</i>                                    | strong    | -0.55               | 0.0005*                                                  | -0.55       | 0.0036                        | 68                          |
| <i>CTNNBIP1</i>                                | strong    | -0.56               | 0.0006*                                                  | -0.56       | 9.5×10 <sup>-4</sup>          | 69                          |
| <i>RRP1</i>                                    | strong    | -0.55               | 0.0006*                                                  | -0.55       | 0.0019                        |                             |
| <i>ZSWIM8</i>                                  | strong    | -0.55               | 0.0006*                                                  | -0.55       | 0.0045                        |                             |
| <i>SRPK2</i>                                   | strong    | -0.54               | 0.0006*                                                  | -0.54       | 0.0018                        | 70                          |
| <i>FHOD1</i>                                   | strong    | -0.54               | 0.0007*                                                  | -0.54       | 0.0024                        | 71                          |
| <i>RBM7</i>                                    | strong    | 0.54                | 0.0007*                                                  | 0.54        | <0.0019                       | 72                          |
| <i>RPS8</i>                                    | weak      | 1.45                | 0.016*                                                   | 0.47        | 0.044                         | 73                          |
| <i>RPL28</i>                                   | weak      | -1.27               | 0.024                                                    | 0.22        | 0.36                          | 74                          |
| <i>RPL31</i>                                   | weak      | -1.06               | 0.042                                                    | 0.29        | 0.18                          | 75                          |
| <b>Clinical stage &lt;IV vs. IV prediction</b> |           |                     |                                                          |             |                               |                             |
| <i>MAPKAPK5</i>                                | weak      | -1.63               | <0.0001*                                                 | -0.57       | 0.0017                        | 76                          |
| <i>BYSL</i>                                    | weak      | -1.62               | <0.0001*                                                 | -0.47       | 0.042                         | 77, 78                      |
| <i>GIGYF2</i>                                  | weak      | 1.16                | <0.0001                                                  | 0.57        | 0.35                          |                             |
| <i>TGOLN2</i>                                  | weak      | -1.10               | <0.0001                                                  | 0.24        | 0.073                         | 80                          |
| <i>TSC2</i>                                    | weak      | 0.96                | <0.0001                                                  | 0.35        | 0.22                          | 81                          |
| <i>SNX5</i>                                    | weak      | 0.91                | <0.0001                                                  | 0.14        | 0.37                          | 82                          |
| <i>PTPRA</i>                                   | weak      | 0.86                | <0.0001                                                  | -0.50       | 0.18                          | 83                          |
| <i>GNPAT</i>                                   | weak      | 0.84                | <0.0001                                                  | 0.23        | 0.21                          |                             |
| <i>RAD54L</i>                                  | weak      | -0.81               | <0.0001                                                  | 0.40        | 0.066                         |                             |
| <i>FANCI</i>                                   | strong    | -0.77               | <0.0001*                                                 | 0.35        | 0.0016                        | 84, 85                      |
| <i>MAP3K7</i>                                  | weak      | -0.76               | <0.0001*                                                 | 0.24        | 0.0045                        | 86                          |
| <i>ELL</i>                                     | weak      | 0.69                | <0.0001                                                  | -0.42       | 0.47                          |                             |
| <i>HNRNPLL</i>                                 | weak      | -0.67               | <0.0001                                                  | -0.33       | 0.057                         | 87                          |
| <i>MAP4K3</i>                                  | weak      | 0.67                | <0.0001                                                  | 0.26        | 0.50                          | 88                          |
| <i>TNRC6A</i>                                  | weak      | 0.67                | <0.0001                                                  | -0.11       | 0.32                          | 89, 90                      |

|                                                                                                                                                                                                                                                                                                                                                                                                                                                                                                                                                                                                                                                                                                                                                                                                                                                                            |        |       |          |       |        |          |
|----------------------------------------------------------------------------------------------------------------------------------------------------------------------------------------------------------------------------------------------------------------------------------------------------------------------------------------------------------------------------------------------------------------------------------------------------------------------------------------------------------------------------------------------------------------------------------------------------------------------------------------------------------------------------------------------------------------------------------------------------------------------------------------------------------------------------------------------------------------------------|--------|-------|----------|-------|--------|----------|
| <i>DDX23</i>                                                                                                                                                                                                                                                                                                                                                                                                                                                                                                                                                                                                                                                                                                                                                                                                                                                               | weak   | -0.66 | <0.0001* | -0.27 | 0.027  | 91       |
| <i>CLASP1</i>                                                                                                                                                                                                                                                                                                                                                                                                                                                                                                                                                                                                                                                                                                                                                                                                                                                              | weak   | 0.65  | <0.0001  | -0.43 | 0.42   | 92       |
| <i>WDHD1</i>                                                                                                                                                                                                                                                                                                                                                                                                                                                                                                                                                                                                                                                                                                                                                                                                                                                               | weak   | -0.64 | <0.0001* | 0.22  | 0.026  | 93, 94   |
| <i>PCNA</i>                                                                                                                                                                                                                                                                                                                                                                                                                                                                                                                                                                                                                                                                                                                                                                                                                                                                | weak   | -0.64 | <0.0001* | -0.59 | 0.017  | 95       |
| <i>LRRRC75A</i>                                                                                                                                                                                                                                                                                                                                                                                                                                                                                                                                                                                                                                                                                                                                                                                                                                                            | strong | -0.63 | <0.0001* | -0.59 | 0.0016 | 96       |
| <i>SNRPB</i>                                                                                                                                                                                                                                                                                                                                                                                                                                                                                                                                                                                                                                                                                                                                                                                                                                                               | weak   | 0.62  | <0.0001  | -0.05 | 0.13   | 97       |
| <i>UBN2</i>                                                                                                                                                                                                                                                                                                                                                                                                                                                                                                                                                                                                                                                                                                                                                                                                                                                                | weak   | 0.61  | <0.0001  | 0.80  | 0.46   | 98       |
| <i>KIF2C</i>                                                                                                                                                                                                                                                                                                                                                                                                                                                                                                                                                                                                                                                                                                                                                                                                                                                               | weak   | 0.60  | <0.0001  | -0.14 | 0.41   | 99       |
| <i>RAD52</i>                                                                                                                                                                                                                                                                                                                                                                                                                                                                                                                                                                                                                                                                                                                                                                                                                                                               | weak   | -0.57 | <0.0001* | -0.46 | 0.026  | 100, 101 |
| <p>† Permutation p-value calculated from permutation test of running the netLDA on the selected gene networks 10,000 times.</p> <p>‡ Marginal p-value calculated from two-sample t test on each individual gene.</p> <p>* Weak gene that has a significant permutation test p-value at level .05 and a significant marginal p-value at level .05.</p> <p>** BRCA1 and BRCA2 genes were not selected by netLDA as strong genes, as they were both filtered out in the data preprocessing by edgeR due to the facts that 84% of samples have counts &lt;10 for BRCA1 and 93% of samples have counts &lt;10 for BRCA2. By default, edgeR requires a minimum count of 10 for samples. We included them in the table because they were widely reported to be associated with ovarian cancer in the literature. Their marginal p-values were achieved from marginal t-tests.</p> |        |       |          |       |        |          |

416



**Table 2. Top selected predictive gene networks**

| Network index hub gene                         | Network size | Strong gene(s) within network                     | Connect genes and selected weak genes within network                                                                                                                                                                                   | Permutation network p-value |
|------------------------------------------------|--------------|---------------------------------------------------|----------------------------------------------------------------------------------------------------------------------------------------------------------------------------------------------------------------------------------------|-----------------------------|
| <b>Cancer occurrence prediction</b>            |              |                                                   |                                                                                                                                                                                                                                        |                             |
| <i>ILDR1</i>                                   | 31           | <i>CLDN3, ILDR1, AP1M2, OVOL2, FOLR1, SMPDL3B</i> | <i>CLDN4, PRSS8, ELF3, EPCAM, ESRP1, KDF1, C1orf210, GRHL2, KRT8, CLDN7, CRB3, MAL2, ST14, SPINT1, TJP3, KRT7, GRB7, MARVELD2, LSR, C6orf132, TMPRSS3, PKP3, MSLN, EPS8L1, TMC4</i>                                                    | <0.0001                     |
| <i>SLC34A2</i>                                 | 29           | <i>KLK8, KLK7, SLC34A2, SMIM22</i>                | <i>FAM83H, KLK6, EHF, TMEM238, VAMP8, PPP1CA, UCP2, ZDHHC12, RGS19, BSPRY, SAMD10, HMGA1, TPD52, INAVA, KRT18, CXXC5, WFDC2, SLPI, SPINT1-AS1, UBE2C, CD24, CRABP2, PTTG1, UBE2T, CDC20</i>                                            | <0.0001                     |
| <b>5-year survival prediction</b>              |              |                                                   |                                                                                                                                                                                                                                        |                             |
| <i>RPS3</i>                                    | 31           | <i>RPS3</i>                                       | <i>RPS8, RPL31, RPS18, RPS24, RPS23, RPL27A, RPS14, RPS29, RPS15A, RPS13, RPL35A, RPS3A, RPL30, RPS15, RPLP1, RPS27, RPL7, RPLP0, RPL18, RPL13A, RPS11, RPL28, RPS19, RPL29, EEF1A1, TPT1, RPS4X, RPS17, RPL41, RPL10</i>              | <0.0001                     |
| <b>Clinical stage &lt;IV vs. IV prediction</b> |              |                                                   |                                                                                                                                                                                                                                        |                             |
| <i>PRIM1</i>                                   | 31           | <i>PRIM1, SENP1</i>                               | <i>CDK2, DDX23, RACGAP1, TUBA1B, HNRNPL, WDR76, HAUS2, MCM6, CTDSPL2, NUSAP1, LMNB1, RFC5, GATC, UNG, RNF34, ANAPC7, PWP1, RMI1, UBQLN1, C9orf64, ZNF367, NAA35, NCBP1, WDHD1, SOCS4, DLGAP5, EXOC5, POLE2, MAPK1IP1L</i>              | 0.024                       |
| <i>PLEKHM3</i>                                 | 31           | <i>PLEKHM3</i>                                    | <i>SRCAP, HCFC1, POM121, POM121C, YLPM1, SMCR8, ASXL2, BIRC6, HEATR5B, SLC30A6, USP34, PUM2, MED1, CDK12, SYNRG, GPATCH8, FBXL20, KANSL1, MGA, TP53, INO80, VPS39, ZNF106, ZSCAN29, ZBTB40, UBR4, SPEN, CLCN6, MTOR, RBM33</i>         | 0.032                       |
| <i>PDK1</i>                                    | 31           | <i>PDK1, PPFIA4</i>                               | <i>HAT1, DYNC112, SP3, ZC3H15, GORASP2, WDR75, DCAF17, TLK1, METTL8, CWC22, PRPF40A, SSB, PRKRA, PLEKHA3, UBE2E3, BZW1, OLA1, SUMO1, ATF2, SF3B1, CREB1, NCKAP1, NFE2L2, HNRNPA3, PFKFB4, HK2, KDM3A, SLC2A1, OXSR1</i>                | 0.0064                      |
| <i>RNFT2</i>                                   | 31           | <i>RNFT2</i>                                      | <i>SART3, BRAP, NAA25, PRDM4, ATXN2, PTPN11, C12orf43, SPPL3, EIF2B1, DENR, VPS33A, DIABLO, IFT81, USP30, ZNF84, MAPKAPK5, C12orf76, RSRC2, SFSWAP, DDX51, RBM19, FBRSL1, SBNO1, PUS1, KDM2B, CAMKK2, DHX37, ZNF664, ANAPC5, RNF10</i> | <0.0001                     |
| <i>IQCC</i>                                    | 31           | <i>IQCC</i>                                       | <i>S100BPB, RBBP4, TXLNA, BSDC1, KPNA6, ZMYM4, CEP85, EYA3, PDIK1L, EXOSC10, HP1BP3, MFN2, ZMYM1, ZMYM6, IPP, PUM1, REV1, GPBP1L1, SNRNP40, ZCCHC17, EIF3I, PEF1, HDAC1, PPP1R8, TMEM234, PHC2, SRSF4, UBXN11, ZBTB8OS, TRNAU1AP</i>   | 0.0020                      |
| <i>RPRD1A</i>                                  | 31           | <i>RPRD1A, PIK3C3</i>                             | <i>ELP2, ZNF24, SLC39A6, ZNF397, ZSCAN30, TRAPPC8, C18orf21, INO80C, RNF138, TPGS2, SNRPD1, IER3IP1, SMAD4, EPG5, SMAD2, DYM, MBD1, ZNF396, KIAA1328, TTC30B, ESCO1, LZTFL1, HDHD2, HNRNPLL, XPO1, MAP4K3, ZFR, DHX9, FBXO11</i>       | 0.0001                      |
| <i>RHOBTB1</i>                                 | 31           | <i>RHOBTB1</i>                                    | <i>CHSY1, AKAP13, ASB7, MEF2A, ABHD2, TCF12, DPY19L1, KBTBD2, HERPUD2, AZI2, MCFD2, VPS41, KIAA1549, SMO, UBN2, DGKD, TTC26, JARID2, TET1, ACVR2B, SALL2, ZNF660,</i>                                                                  | <0.0001                     |

|                                                                                                |    |               |                                                                                                                                                                                                                                                                                                     |         |
|------------------------------------------------------------------------------------------------|----|---------------|-----------------------------------------------------------------------------------------------------------------------------------------------------------------------------------------------------------------------------------------------------------------------------------------------------|---------|
|                                                                                                |    |               | FAM117B, ZNF605, <b>ZNF697</b> , DCHS1, ADAMTS7, LAMB1, TRAM2, SEMA7A                                                                                                                                                                                                                               |         |
| KRAS                                                                                           | 31 | KRAS          | FGFR1OP2, KLHL42, ETNK1, MRPS35, TM7SF3, STK38L, RECQL, GOLT1B, STRAP, WBP11, C12orf4, AEBP2, IPO8, DNM1L, ATF7IP, CCDC91, MATR3, ATF6, C2CD5, CMAS, PLEKHA5, PYROXD1, ATN1, TULP3, RPAP3, SCAF11, <b>ATF1</b> , ASB8, <b>TWF1</b> , CCNT1                                                          | 0.019   |
| SLC1A4                                                                                         | 31 | <b>SLC1A4</b> | IMMT, KCMF1, USP39, <b>CIAO1</b> , <b>PTCD3</b> , MRPL35, SMC1A, KDM5C, <b>HUWE1</b> , MED14, DDX3X, POLA1, VCP, <b>UBAP1</b> , UBE2R2, TESK1, <b>DNAJA1</b> , SMU1, <b>ACTR2</b> , RAB1A, PPP3R1, UGP2, RAB10, AFTPH, <b>TEX261</b> , <b>PCBP1</b> , TMEM127, DCTN1, <b>TGOLN2</b> , STAU1         | 0.0001  |
| CEP97                                                                                          | 31 | <b>CEP97</b>  | ZBTB11, TBC1D23, <b>PCNP</b> , ZNF143, CGGBP1, ZNF148, <b>SPICE1</b> , GTF2E1, <b>GSK3B</b> , <b>SLC35A5</b> , BBX, TFG, SENP7, ZBTB41, <b>NSUN3</b> , RCOR3, DDX17, WDR11, <b>ARL6</b> , CPOX, CLDND1, <b>ABHD10</b> , EFCAB7, LANCL1, CCP110, THUMPD1, KNOP1, COQ7, ERI2, NFATC2IP                | 0.0028  |
| ZNF669                                                                                         | 31 | ZNF669        | ZNF670, ZNF124, CNST, DESI2, B3GALNT2, SPRTN, AHCTF1, HNRNPU, <b>ARID4B</b> , HEATR1, WDR26, RAB3GAP2, <b>COG2</b> , <b>GNPAT</b> , TAF5L, IARS2, TSNAX, EXOC8, <b>SH3BP5L</b> , ZNF672, PARP1, <b>ZNF496</b> , PGBD2, TRIM11, RBBP5, <b>KLHL12</b> , CDC73, <b>DSTYK</b> , <b>NUCKS1</b> , RPS6KC1 | 0.00030 |
| C20orf96                                                                                       | 31 | C20orf96      | SOX12, ZCCHC3, <b>IDH3B</b> , NRSN2, PSMF1, <b>UBOX5</b> , <b>PCED1A</b> , RBCK1, CRLS1, MRPS26, ITPA, CDS2, DZANK1, EFHC1, BBS5, TASP1, NEK11, <b>NPHP1</b> , DHX35, CTNBL1, DDX27, <b>CDK5RAP1</b> , SRSF6, UQCC1, BTBD3, RBBP9, GZF1, PBRM1, SPAST, MSL1                                         | 0.011   |
| MYEF2                                                                                          | 31 | <b>MYEF2</b>  | GABPB1, <b>ARPP19</b> , COPS2, <b>DTWD1</b> , <b>USP8</b> , ANP32A, SLTM, SON, RTF1, PRRC2C, DPP8, SP1, <b>TCERG1</b> , RBM27, DDX46, HNRNPH1, PNN, PRPF38B, <b>SRSF10</b> , SRRM1, <b>PNRC2</b> , SFPQ, <b>HNRNPA2B1</b> , <b>HNRNPDL</b> , <b>HNRNPH3</b> , YTHDC1, HNRNPK, FUS, SIRT1, CTCF      | 0.0025  |
| DET1                                                                                           | 31 | <b>DET1</b>   | UNC45A, CRTC3, SEMA4B, SNX1, PEX11A, <b>SCAMP2</b> , TTC23, TM2D3, SSRP1, LRRC28, CSNK1G1, ARPIN, MRPL46, MRPS11, SEC11A, WDR61, <b>ZFAND6</b> , HDDC3, <b>SLC24A1</b> , SPG11, PDCD7, <b>HERC1</b> , PIAS1, <b>DIS3L</b> , SCAPER, ARIH1, <b>DENND4A</b> , CLPX, FBXO22, MAN2C1                    | 0.017   |
| Bolded genes are the selected genes (including both strong and weak genes) within the network. |    |               |                                                                                                                                                                                                                                                                                                     |         |

**Table 3. Top enriched KEGG pathways and their overlapping selected gene networks**

| Pathway name                              | Enrichment pval       | Enrichment padj       | NES   | Pathway size | LeadingEdge genes in pathway                                                                                                                                                                                                                                                                                                                                                                                                                               | Overlapping with selected genes networks                                                                                                                                 |
|-------------------------------------------|-----------------------|-----------------------|-------|--------------|------------------------------------------------------------------------------------------------------------------------------------------------------------------------------------------------------------------------------------------------------------------------------------------------------------------------------------------------------------------------------------------------------------------------------------------------------------|--------------------------------------------------------------------------------------------------------------------------------------------------------------------------|
| cc                                        |                       |                       |       |              |                                                                                                                                                                                                                                                                                                                                                                                                                                                            |                                                                                                                                                                          |
| KEGG_CEL_L_CYCLE                          | 2.36×10 <sup>-5</sup> | 1.38×10 <sup>-3</sup> | 1.79  | 112          | E2F2/CDKN2A/CDC45/TTK/PKMYT1/CDC20/CCNA1/BUB1B/PTTG1/SFN/BUB1/CCNB2/ESPL1/CCNE1/CDK1/CDC6/MAD2L1/CCNB1/PLK1/E2F3/CDKN2B/CND1/MCM2/E2F1/CCNA2/MCM4/CHEK1                                                                                                                                                                                                                                                                                                    | CDC20/PTTG1                                                                                                                                                              |
| KEGG_LEUKOCYTE_TRANSENDOTHELIAL_MIGRATION | 1.51×10 <sup>-3</sup> | 2.26×10 <sup>-2</sup> | 1.68  | 83           | CLDN6/CLDN3/CLDN9/CLDN16/CLDN4/CLDN7/CLDN10/MMP9/VAV3/VAV1/CXCR4/THY1/CLDN1/CYBA/ITGAL/CYBB/OCLN/RAC2/ITGB2                                                                                                                                                                                                                                                                                                                                                | CLDN3/CLDN4/CLDN7                                                                                                                                                        |
| KEGG_TIGHT_JUNCTION                       | 1.63×10 <sup>-3</sup> | 2.26×10 <sup>-2</sup> | 1.63  | 97           | CLDN6/CLDN3/CLDN9/CLDN16/TJP3/CRB3/CLDN4/CLDN7/CLDN10/MYH14/PPP2R2B/PARD6B/PRKCQ/CLDN1/PRKCZ/CGN/OCLN                                                                                                                                                                                                                                                                                                                                                      | CLDN3/TJP3/CRB3/CLDN4/CLDN7                                                                                                                                              |
| KEGG_CEL_L_ADHESION_MOLECULES_CAMS        | 2.04×10 <sup>-3</sup> | 2.38×10 <sup>-2</sup> | 1.64  | 85           | CLDN6/CLDN3/CLDN9/CLDN16/CLDN4/CLDN7/CLDN10/HLA-DQA2/CDH1/L1CAM/SDC1/ICOSLG/HLA-DQA1/HLA-DQB1/SELPLG/NRCAM/HLA-DRB5/HLA-DOA/CLDN1/ICAM3/HLA-DMB/HLA-DRA/ITGAL/CADM3/HLA-DPA1/HLA-DRB1/VCAN/HLA-DMA/OCLN/HLA-DPB1/ITGB2/CDH2/CD4/ITGB8/NECTIN1/PTPRC/SDC4/CADM1/ICAM1/SDC3                                                                                                                                                                                  | CLDN3/CLDN4/CLDN7                                                                                                                                                        |
| surv                                      |                       |                       |       |              |                                                                                                                                                                                                                                                                                                                                                                                                                                                            |                                                                                                                                                                          |
| KEGG_RIBOSOME                             | 1.97E-30              | 3.29E-28              | 3.11  | 81           | MRPL13/RSL24D1/RPS25/RPL36A/RPL10A/RPS3/RPL30/RPS8/RPS12/RPS26/RPL15/RPS23/RPL35A/RPL18A/RPS5/RPL8/RPS15/RPS20/RPL18/RPL36/RPL9/RPL11/FAU/RPS27/RPS15A/RPL10/RPS19/RPS13/RPL27/RPL37/RPS3A/RPS4X/RPS24/RPS29/RPL35/RPL5/RPL23/RPS27A/RPL7/RPS27L/RPS21/RPL10L/RPL34/RPL32/RPL28/RPLP2/RPL14/RPLP1/RPSA/RPL24/RPLP0/RPS6/RPL3/RPL27A/RPL31/RPS18/RPS16/RPS11/RPL19/RPL13/RPL13A/RPS17/RPS10/RPL7A/RPL23A/RPL29/RPS2/RPL41/RPL4/RPL22/RPL38/UBA52/RPS7/RPL12 | RPS3/RPL30/RPS8/RPS23/RPL35A/RPS15/RPL18/RPS27/RPS15A/RPL10/RPS19/RPS13/RPS3A/RPS4X/RPS24/RPS29/RPL7/RPL28/RPLP1/RPLP0/RPL27A/RPL31/RPS18/RPS11/RPL13A/RPS17/RPL29/RPL41 |
| Stage                                     |                       |                       |       |              |                                                                                                                                                                                                                                                                                                                                                                                                                                                            |                                                                                                                                                                          |
| KEGG_CEL_L_CYCLE                          | 0.00044               | 0.0072                | -1.75 | 113          | TGFB2/CCND2/CDC6/CDC7/E2F1/CDC45/MCM2/CDC25A/ORC3/RBL1/TTK/E2F3/E2F5/CCNE1/MCM3/SMAD4/BUB1B/SMAD2/E2F2/PKMYT1/CCNA2/MAD2L1/CREBBP/WEE1/ESPL1/PCNA/CDK2/SKP2/CCNB2/PLK1/CHEK1/CDC25B/CHAK2/ANAPC7/STAG1/CDKN1C/CCNB1/CDKN1B/ATM/ORC6/RBL2/CDK1                                                                                                                                                                                                              | CDK2/ANAPC7/CCNB2/CCNB1/CDK1/SMAD4/SMAD2/TTK/MCM2/MCM3/ORC3/E2F1/RBL1/CCNA2/PLK1/CDC6/BUB1B/PCNA/CREBBP                                                                  |
| KEGG_BASIC_CELL_CARCINOMA                 | 0.0016                | 0.022                 | -1.87 | 35           | WNT6/FZD5/GLI2/FZD10/GLI3/WNT10A/FZD2/LEF1/WNT2B/STK36                                                                                                                                                                                                                                                                                                                                                                                                     | STK36/WNT6                                                                                                                                                               |
| KEGG_PATHWAYS_IN_CANCER                   | 0.008121385           | 0.075                 | -1.43 | 237          | WNT6/LAMA1/MMP9/CXCL8/TGFB2/FZD5/GLI2/ARNT2/FZD10/GLI3/BCL2/KRAS/WNT10A/LAMC3/LAMB3/MECOM/E2F1/FZD2/LEF1/CSF3R/WNT2B/E2F3/CCNE1/IGF1R/STK36/SMAD4/PLCG1/FGFR1/SMAD2/LAMB1/E2F2/PIAS2/CREBBP                                                                                                                                                                                                                                                                | STK36/CDK2/PLCG1/WNT6/SMAD4/SMAD2/LAMB1/KRAS                                                                                                                             |

|                                                                                  |                |      |       |    |                                                                                                                            |                                                                |
|----------------------------------------------------------------------------------|----------------|------|-------|----|----------------------------------------------------------------------------------------------------------------------------|----------------------------------------------------------------|
|                                                                                  |                |      |       |    | <i>P/CBLB/PDGFB/VHL/CDK2/SKP2/MAPK8/MLH1</i>                                                                               | <i>E2F1<br/>MAPK8<br/>CREBBP</i>                               |
| KEGG_HED<br>GEHOG_S<br>IGNALING_P<br>ATHWAY                                      | 0.0145528<br>4 | 0.11 | -1.68 | 31 | <i>WNT6/LRP2/ZIC2/GLI2/GLI3/WNT10A/<br/>WNT2B/STK36</i>                                                                    | <i>STK36<br/>WNT6</i>                                          |
| KEGG_MEL<br>ANOGENES<br>IS                                                       | 0.021          | 0.16 | -1.48 | 63 | <i>WNT6/FZD5/FZD10/KRAS/WNT10A/PL<br/>CB4/ADCY5/GNAO1/FZD2/LEF1/WNT2<br/>B/ADCY7/PLCB1/CREBBP/CREB1/CRE<br/>B3L4/ADCY6</i> | <i>WNT6<br/>CREB1<br/>KRAS<br/>CREBBP</i>                      |
| KEGG_MIS<br>MATCH_RE<br>PAIR                                                     | 0.062          | 0.36 | -1.51 | 21 | <i>EXO1/RFC4/RFC5/RFC3/PCNA/MLH1/P<br/>OLD3/MSH2/LIG1/RFC1/RPA1/MSH3/M<br/>SH6</i>                                         | <i>RFC5<br/>MSH3<br/>MSH2/MSH6<br/>EXO1/PCNA</i>               |
| KEGG_GLY<br>COSYLPHO<br>SPHATIDYLI<br>NOSITOL_G<br>PI_ANCHOR<br>BIOSYNTH<br>ESIS | 0.064          | 0.36 | -1.51 | 19 | <i>PIGF/PIGG/PIGN/PIGQ/PIGB/PIGU/PIG<br/>O/PGAP1/PIGM/PIGT/PIGX/PIGP/PIGV</i>                                              | <i>PIGN</i>                                                    |
| KEGG_DNA<br>REPLICATI<br>ON                                                      | 0.060          | 0.36 | -1.47 | 33 | <i>DNA2/MCM2/RFC4/RFC5/PRIM2/MCM3<br/>/RFC3/PCNA/POLE/POLD3/LIG1/RFC1/<br/>RPA1/POLA1/FEN1</i>                             | <i>RFC5<br/>POLE<br/>FEN1<br/>MCM2/MCM3<br/>POLA1<br/>PCNA</i> |
| KEGG_ECM<br>RECEPTO<br>R_INTERAC<br>TION                                         | 0.072          | 0.38 | -1.37 | 59 | <i>COL2A1/LAMA1/SV2A/LAMC3/LAMB3/I<br/>TGA7/HMMR/LAMB1/SDC1/THBS4</i>                                                      | <i>LAMB1<br/>COL2A1</i>                                        |

418

419 Reference

- 420
- 421 1. Matulonis UA, Sood AK, Fallowfield L, Howitt BE, Sehouli J, Karlan BY. Ovarian cancer. *Nat*
- 422 *Rev Dis Primers*. 2016 Aug 25;2:16061. doi: 10.1038/nrdp.2016.61. PMID: 27558151; PMCID:
- 423 PMC7290868.
- 424 2. Stewart C, Ralyea C, Lockwood S. Ovarian Cancer: An Integrated Review. *Semin Oncol Nurs*.
- 425 2019 Apr;35(2):151-156. doi: 10.1016/j.soncn.2019.02.001. Epub 2019 Mar 11. PMID:
- 426 30867104.
- 427 3. Alexandrova E, Pecoraro G, Sellitto A, Melone V, Ferravante C, Rocco T, Guacci A, Giurato G,
- 428 Nassa G, Rizzo F, Weisz A, Tarallo R. An Overview of Candidate Therapeutic Target Genes in
- 429 Ovarian Cancer. *Cancers (Basel)*. 2020 Jun 4;12(6):1470. doi: 10.3390/cancers12061470. PMID:
- 430 32512900; PMCID: PMC7352306.
- 431 4. National Cancer Institute. Surveillance, Epidemiology, and End Results Program.
- 432 <https://seer.cancer.gov/statfacts/html/ovary.html>.
- 433 5. Petrucelli N, Daly MB, Pal T. BRCA1- and BRCA2-Associated Hereditary Breast and Ovarian
- 434 Cancer. 1998 Sep 4 [updated 2023 Sep 21]. In: Adam MP, Mirzaa GM, Pagon RA, Wallace SE,
- 435 Bean LJH, Gripp KW, Amemiya A, editors. *GeneReviews®* [Internet]. Seattle (WA): University
- 436 of Washington, Seattle; 1993–2023. PMID: 20301425.
- 437 6. Sánchez-Lorenzo L, Salas-Benito D, Villamayor J, Patiño-García A, González-Martín A. The
- 438 BRCA Gene in Epithelial Ovarian Cancer. *Cancers (Basel)*. 2022 Feb 27;14(5):1235. doi:
- 439 10.3390/cancers14051235. PMID: 35267543; PMCID: PMC8909050.
- 440 7. Casaubon JT, Kashyap S, Regan JP. BRCA1 and BRCA2 Mutations. 2023 Jul 23. In: *StatPearls*
- 441 [Internet]. Treasure Island (FL): StatPearls Publishing; 2023 Jan–. PMID: 29262038.
- 442 8. Takaoka M, Miki Y. BRCA1 gene: function and deficiency. *Int J Clin Oncol*. 2018 Feb;23(1):36-
- 443 44. doi: 10.1007/s10147-017-1182-2. Epub 2017 Sep 7. PMID: 28884397.
- 444 9. Tayama S, Motohara T, Narantuya D, Li C, Fujimoto K, Sakaguchi I, Tashiro H, Saya H, Nagano
- 445 O, Katabuchi H. The impact of EpCAM expression on response to chemotherapy and clinical
- 446 outcomes in patients with epithelial ovarian cancer. *Oncotarget*. 2017 Jul 4;8(27):44312-44325.
- 447 doi: 10.18632/oncotarget.17871. PMID: 28574829; PMCID: PMC5546482.
- 448 10. Nunna S, Reinhardt R, Ragozin S, Jeltsch A. Targeted methylation of the epithelial cell adhesion
- 449 molecule (EpCAM) promoter to silence its expression in ovarian cancer cells. *PLoS One*. 2014
- 450 Jan 29;9(1):e87703. doi: 10.1371/journal.pone.0087703. PMID: 24489952; PMCID:
- 451 PMC3906225.
- 452 11. Zhang Y, Cao L, Nguyen D, Lu H. TP53 mutations in epithelial ovarian cancer. *Transl Cancer*
- 453 *Res*. 2016 Dec;5(6):650-663. doi: 10.21037/tcr.2016.08.40. PMID: 30613473; PMCID:
- 454 PMC6320227.
- 455 12. Silwal-Pandit L, Langerød A, Børresen-Dale AL. TP53 Mutations in Breast and Ovarian Cancer.
- 456 *Cold Spring Harb Perspect Med*. 2017 Jan 3;7(1):a026252. doi: 10.1101/cshperspect.a026252.
- 457 PMID: 27815305; PMCID: PMC5204332.
- 458 13. He WP, Guo YY, Yang GP, Lai HL, Sun TT, Zhang ZW, Ouyang LL, Zheng Y, Tian LM, Li XH,
- 459 You ZS, Xie D, Yang GF. CHD1L promotes EOC cell invasiveness and metastasis via the
- 460 regulation of METAP2. *Int J Med Sci*. 2020 Aug 29;17(15):2387-2395. doi: 10.7150/ijms.48615.
- 461 PMID: 32922205; PMCID: PMC7484650.
- 462 14. Soltan MA, Eldeen MA, Eid RA, Alyamani NM, Alqahtani LS, Albogami S, Jafri I, Park MN,
- 463 Alsharif G, Fayad E, Mohamed G, Osman R, Kim B, Zaki MSA. A pan-cancer analysis reveals
- 464 CHD1L as a prognostic and immunological biomarker in several human cancers. *Front Mol*
- 465 *Biosci*. 2023 Mar 23;10:1017148. doi: 10.3389/fmolb.2023.1017148. PMID: 37033447; PMCID:
- 466 PMC10076660.
- 467 15. He WP, Zhou J, Cai MY, Xiao XS, Liao YJ, Kung HF, Guan XY, Xie D, Yang GF. CHD1L
- 468 protein is overexpressed in human ovarian carcinomas and is a novel predictive biomarker for

- 469 patients survival. *BMC Cancer*. 2012 Sep 29;12:437. doi: 10.1186/1471-2407-12-437. PMID:  
470 23020525; PMCID: PMC3551745.
- 471 16. Pawar A, Chowdhury OR, Chauhan R, Talole S, Bhattacharjee A. Identification of key gene  
472 signatures for the overall survival of ovarian cancer. *J Ovarian Res*. 2022 Jan 20;15(1):12. doi:  
473 10.1186/s13048-022-00942-0. PMID: 35057823; PMCID: PMC8780391.
- 474 17. Millstein J, Budden T, Goode EL, Anglesio MS, Talhouk A, Intermaggio MP, Leong HS, Chen S,  
475 Elatre W, Gilks B, Nazeran T, Volchek M, Bentley RC, Wang C, Chiu DS, Kommoss S, Leung  
476 SCY, Senz J, Lum A, Chow V, Sudderuddin H, Mackenzie R, George J; AOCs Group; Fereday S,  
477 Hendley J, Traficante N, Steed H, Koziak JM, Köbel M, McNeish IA, Goranova T, Ennis D,  
478 Macintyre G, Silva De Silva D, Ramón Y Cajal T, García-Donas J, Hernando Polo S, Rodriguez  
479 GC, Cushing-Haugen KL, Harris HR, Greene CS, Zelaya RA, Behrens S, Fortner RT, Sinn P,  
480 Herpel E, Lester J, Lubiński J, Oszurek O, Tołoczko A, Cybulski C, Menkiszak J, Pearce CL,  
481 Pike MC, Tseng C, Alsop J, Rhenius V, Song H, Jimenez-Linan M, Piskorz AM, Gentry-Maharaj  
482 A, Karpinskyj C, Widschwendter M, Singh N, Kennedy CJ, Sharma R, Harnett PR, Gao B,  
483 Johnatty SE, Sayer R, Boros J, Winham SJ, Keeney GL, Kaufmann SH, Larson MC, Luk H,  
484 Hernandez BY, Thompson PJ, Wilkens LR, Carney ME, Trabert B, Lissowska J, Brinton L,  
485 Sherman ME, Bodelon C, Hinsley S, Lewsley LA, Glasspool R, Banerjee SN, Stronach EA,  
486 Haluska P, Ray-Coquard I, Mahner S, Winterhoff B, Slamon D, Levine DA, Kelemen LE,  
487 Benitez J, Chang-Claude J, Gronwald J, Wu AH, Menon U, Goodman MT, Schildkraut JM,  
488 Wentzensen N, Brown R, Berchuck A, Chenevix-Trench G, deFazio A, Gayther SA, García MJ,  
489 Henderson MJ, Rossing MA, Beeghly-Fadiel A, Fasching PA, Orsulic S, Karlan BY, Konecny  
490 GE, Huntsman DG, Bowtell DD, Brenton JD, Doherty JA, Pharoah PDP, Ramus SJ. Prognostic  
491 gene expression signature for high-grade serous ovarian cancer. *Ann Oncol*. 2020  
492 Sep;31(9):1240-1250. doi: 10.1016/j.annonc.2020.05.019. Epub 2020 May 28. PMID: 32473302;  
493 PMCID: PMC7484370.
- 494 18. Marchini S, Mariani P, Chiorino G, Marrazzo E, Bonomi R, Fruscio R, Clivio L, Garbi A, Torri V,  
495 Cinquini M, Dell'Anna T, Apolone G, Broggin M, D'Incalci M. Analysis of gene expression in  
496 early-stage ovarian cancer. *Clin Cancer Res*. 2008 Dec 1;14(23):7850-60. doi: 10.1158/1078-  
497 0432.CCR-08-0523. PMID: 19047114.
- 498 19. Li Y, Hong HG, Ahmed SE, Li Y. Weak signals in high-dimension regression: detection,  
499 estimation and prediction. *Appl Stoch Models Bus Ind*. 2019;35(2):283-98. Epub 2019/11/02. doi:  
500 10.1002/asmb.2340. PubMed PMID: 31666801; PubMed Central PMCID: PMC6821396.
- 501 20. Li Y, Hong HG, Li Y. Multiclass linear discriminant analysis with ultrahigh-dimensional features.  
502 *Biometrics*. 2019;75(4):1086-97. Epub 2019/04/23. doi: 10.1111/biom.13065. PubMed PMID:  
503 31009070; PubMed Central PMCID: PMC6810714.
- 504 21. Li Y. (2020). A Local-Network Guided Linear Discriminant Analysis for Classifying Lung Cancer  
505 Subtypes using Individual Genome-Wide Methylation Profiles. In: Arai, K., Bhatia, R., Kapoor,  
506 S. (eds) Proceedings of the Future Technologies Conference (FTC) 2019. FTC 2019. Advances in  
507 Intelligent Systems and Computing, vol 1069. Springer, Cham. [https://doi.org/10.1007/978-3-](https://doi.org/10.1007/978-3-030-32520-6_50)  
508 030-32520-6\_50.
- 509 22. Li Y, Kang J, Wu C, et al. A machine-learning approach for detection of local brain networks and  
510 marginally weak signals identifies novel AD/MCI differentiating connectomic neuroimaging  
511 biomarkers. *BioRxiv*. doi: <https://doi.org/10.1101/2021.07.29.454368>.
- 512 23. Zhou X, Zhang J, Ding Y, Huang H, Li Y, Chen W. Predicting late-stage age-related macular  
513 degeneration by integrating marginally weak SNPs in GWA studies. *Front Genet*.  
514 2023;14:1075824. Epub 2023/04/18. doi: 10.3389/fgene.2023.1075824. PubMed PMID:  
515 37065470; PubMed Central PMCID: PMC68101437.
- 516 24. Robinson MD, McCarthy DJ, Smyth GK. edgeR: a Bioconductor package for differential  
517 expression analysis of digital gene expression data. *Bioinformatics*. 2010 Jan 1;26(1):139-40. doi:  
518 10.1093/bioinformatics/btp616. Epub 2009 Nov 11. PMID: 19910308; PMCID: PMC2796818.

- 519 25. Satija R, Farrell JA, Gennert D, Schier AF, Regev A. Spatial reconstruction of single-cell gene  
520 expression data. *Nat Biotechnol.* 2015 May;33(5):495-502. doi: 10.1038/nbt.3192. Epub 2015  
521 Apr 13. PMID: 25867923; PMCID: PMC4430369.
- 522 26. Tibshirani R. Regression Shrinkage and Selection via the Lasso. *Journal of the Royal Statistical*  
523 *Society: Series B (Methodological).* 1996; 58, 267-288. <http://www.jstor.org/stable/2346178>.  
524 <https://doi.org/10.1111/j.2517-6161.1996.tb02080.x>.
- 525 27. Hilt DE, Seegerist, DW. Ridge, a computer program for calculating ridge regression estimates.  
526 1977; doi:10.5962/bhl.title.68934.
- 527 28. Zou H, Hastie T. Regularization and Variable Selection via the Elastic Net. *Journal of the Royal*  
528 *Statistical Society, Series B.* 2005; 67 (2): 301–320. CiteSeerX 10.1.1.124.4696.  
529 doi:10.1111/j.1467-9868.2005.00503.x. S2CID 122419596.
- 530 29. Chen TQ, Guestrin C. XGBoost: A Scalable Tree Boosting System. In Krishnapuram B, Shah M,  
531 Smola AJ, Aggarwal CC, Shen D, Rastogi R (eds.). *Proceedings of the 22nd ACM SIGKDD*  
532 *International Conference on Knowledge Discovery and Data Mining, San Francisco, CA, USA,*  
533 *2016 August 13-17, 2016.* ACM. pp. 785–794. arXiv:1603.02754. doi:10.1145/2939672.2939785.  
534 ISBN 9781450342322. S2CID 4650265.
- 535 30. Liu GM, Zeng HD, Zhang CY, Xu JW. Identification of a six-gene signature predicting overall  
536 survival for hepatocellular carcinoma. *Cancer Cell Int.* 2019 May 21;19:138. doi:  
537 10.1186/s12935-019-0858-2. PMID: 31139015; PMCID: PMC6528264.
- 538 31. Subramanian A, Tamayo P, Mootha VK, Mukherjee S, Ebert BL, Gillette MA, Paulovich A,  
539 Pomeroy SL, Golub TR, Lander ES, Mesirov JP. Gene set enrichment analysis: a knowledge-  
540 based approach for interpreting genome-wide expression profiles. *Proc Natl Acad Sci U S A.*  
541 2005 Oct 25;102(43):15545-50. doi: 10.1073/pnas.0506580102. Epub 2005 Sep 30. PMID:  
542 16199517; PMCID: PMC1239896.
- 543 32. Harris MA, Clark J, Ireland A, Lomax J, Ashburner M, Foulger R, Eilbeck K, Lewis S, Marshall  
544 B, Mungall C, Richter J, Rubin GM, Blake JA, Bult C, Dolan M, Drabkin H, Eppig JT, Hill DP,  
545 Ni L, Ringwald M, Balakrishnan R, Cherry JM, Christie KR, Costanzo MC, Dwight SS, Engel S,  
546 Fisk DG, Hirschman JE, Hong EL, Nash RS, Sethuraman A, Theesfeld CL, Botstein D, Dolinski  
547 K, Feierbach B, Berardini T, Mundodi S, Rhee SY, Apweiler R, Barrell D, Camon E, Dimmer E,  
548 Lee V, Chisholm R, Gaudet P, Kibbe W, Kishore R, Schwarz EM, Sternberg P, Gwinn M,  
549 Hannick L, Wortman J, Berriman M, Wood V, de la Cruz N, Tonellato P, Jaiswal P, Seigfried T,  
550 White R; Gene Ontology Consortium. The Gene Ontology (GO) database and informatics  
551 resource. *Nucleic Acids Res.* 2004 Jan 1;32(Database issue):D258-61. doi: 10.1093/nar/gkh036.  
552 PMID: 14681407; PMCID: PMC308770.
- 553 33. Kanehisa M, Goto S. KEGG: kyoto encyclopedia of genes and genomes. *Nucleic Acids Res.* 2000  
554 Jan 1;28(1):27-30. doi: 10.1093/nar/28.1.27. PMID: 10592173; PMCID: PMC102409.
- 555 34. Abreu RDS, Antunes D, Moreira ADS, Passetti F, Mendonça JB, de Araújo NS, Sassaro TF,  
556 Alberto AVP, Carrossini N, Fernandes PV, Costa MA, Guimarães ACR, Degraive WMS, Waghbi  
557 MC. Next Generation of Ovarian Cancer Detection Using Aptamers. *Int J Mol Sci.* 2023 Mar  
558 28;24(7):6315. doi: 10.3390/ijms24076315. PMID: 37047289; PMCID: PMC10094455.
- 559 35. Vlasenkova R, Nurgalieva A, Akberova N, Bogdanov M, Kiyamova R. Characterization of  
560 SLC34A2 as a Potential Prognostic Marker of Oncological Diseases. *Biomolecules.* 2021 Dec  
561 14;11(12):1878. doi: 10.3390/biom11121878. PMID: 34944522; PMCID: PMC8699446.
- 562 36. Sehovic E, Hadrovic A, Dogan S. Detection and analysis of stable and flexible genes towards a  
563 genome signature framework in cancer. *Bioinformatics.* 2019 Nov 10;15(10):772-779. doi:  
564 10.6026/97320630015772. PMID: 31831960; PMCID: PMC6900328.
- 565 37. Fierheller CT, Alenezi WM, Serruya C, Revil T, Amuzu S, Bedard K, Subramanian DN, Fewings  
566 E, Bruce JP, Prokopec S, Bouchard L, Provencher D, Foulkes WD, El Haffaf Z, Mes-Masson  
567 AM, Tischkowitz M, Campbell IG, Pugh TJ, Greenwood CMT, Ragoussis J, Tonin PN. Molecular  
568 Genetic Characteristics of FANCI, a Proposed New Ovarian Cancer Predisposing Gene. *Genes*

- 569 (Basel). 2023 Jan 20;14(2):277. doi: 10.3390/genes14020277. PMID: 36833203; PMCID:  
570 PMC9956348.
- 571 38. Fierheller CT, Guitton-Sert L, Alenezi WM, Revil T, Oros KK, Gao Y, Bedard K, Arcand SL,  
572 Serruya C, Behl S, Meunier L, Fleury H, Fewings E, Subramanian DN, Nadaf J, Bruce JP, Bell R,  
573 Provencher D, Foulkes WD, El Haffaf Z, Mes-Masson AM, Majewski J, Pugh TJ, Tischkowitz  
574 M, James PA, Campbell IG, Greenwood CMT, Ragoussis J, Masson JY, Tonin PN. A functionally  
575 impaired missense variant identified in French Canadian families implicates FANCI as a  
576 candidate ovarian cancer-predisposing gene. *Genome Med.* 2021 Dec 3;13(1):186. doi:  
577 10.1186/s13073-021-00998-5. PMID: 34861889; PMCID: PMC8642877.
- 578 39. Takakura S, Kohno T, Manda R, Okamoto A, Tanaka T, Yokota J. Genetic alterations and  
579 expression of the protein phosphatase 1 genes in human cancers. *Int J Oncol.* 2001  
580 Apr;18(4):817-24. doi: 10.3892/ijo.18.4.817. PMID: 11251179.
- 581 40. Kim DK, Seo EJ, Choi EJ, Lee SI, Kwon YW, Jang IH, Kim SC, Kim KH, Suh DS, Seong-Jang  
582 K, Lee SC, Kim JH. Crucial role of HMGA1 in the self-renewal and drug resistance of ovarian  
583 cancer stem cells. *Exp Mol Med.* 2016 Aug 26;48(8):e255. doi: 10.1038/emm.2016.73. PMID:  
584 27561949; PMCID: PMC5007643.
- 585 41. Yan S, Frank D, Son J, Hannan KM, Hannan RD, Chan KT, Pearson RB, Sanij E. The Potential  
586 of Targeting Ribosome Biogenesis in High-Grade Serous Ovarian Cancer. *Int J Mol Sci.* 2017 Jan  
587 20;18(1):210. doi: 10.3390/ijms18010210. PMID: 28117679; PMCID: PMC5297839.
- 588 42. Yang T, Chen WC, Shi PC, Liu MR, Jiang T, Song H, Wang JQ, Fan RZ, Pei DS, Song J. Long  
589 noncoding RNA MAPKAPK5-AS1 promotes colorectal cancer progression by cis-regulating the  
590 nearby gene MK5 and acting as a let-7f-1-3p sponge. *J Exp Clin Cancer Res.* 2020 Jul  
591 20;39(1):139. doi: 10.1186/s13046-020-01633-8. Erratum in: *J Exp Clin Cancer Res.* 2022 Dec  
592 13;41(1):341. PMID: 32690100; PMCID: PMC7370515.
- 593 43. Gao S, Sha Z, Zhou J, Wu Y, Song Y, Li C, Liu X, Zhang T, Yu R. BYSL contributes to tumor  
594 growth by cooperating with the mTORC2 complex in gliomas. *Cancer Biol Med.* 2021 Feb  
595 15;18(1):88-104. doi: 10.20892/j.issn.2095-3941.2020.0096. PMID: 33628587; PMCID:  
596 PMC7877178.
- 597 44. Li J, Zhi X, Shen X, Chen C, Yuan L, Dong X, Zhu C, Yao L, Chen M. Depletion of UBE2C  
598 reduces ovarian cancer malignancy and reverses cisplatin resistance via downregulating CDK1.  
599 *Biochem Biophys Res Commun.* 2020 Mar 5;523(2):434-440. doi: 10.1016/j.bbrc.2019.12.058.  
600 Epub 2019 Dec 23. PMID: 31875843.
- 601 45. Martínez-Canales S, López de Rodas M, Nuncia-Cantarero M, Páez R, Amir E, Györfy B,  
602 Pandiella A, Galán-Moya EM, Ocaña A. Functional transcriptomic annotation and protein-protein  
603 interaction analysis identify EZH2 and UBE2C as key upregulated proteins in ovarian cancer.  
604 *Cancer Med.* 2018 May;7(5):1896-1907. doi: 10.1002/cam4.1406. Epub 2018 Mar 25. PMID:  
605 29575713; PMCID: PMC5943485.
- 606 46. Xiang C, Yan HC. Ubiquitin conjugating enzyme E2 C (UBE2C) may play a dual role involved in  
607 the progression of thyroid carcinoma. *Cell Death Discov.* 2022 Mar 24;8(1):130. doi:  
608 10.1038/s41420-022-00935-4. PMID: 35332135; PMCID: PMC8948250.
- 609 47. Abreu RDS, Antunes D, Moreira ADS, Passetti F, Mendonça JB, de Araújo NS, Sassaro TF,  
610 Alberto AVP, Carrossini N, Fernandes PV, Costa MA, Guimarães ACR, Degraive WMS, Waghbi  
611 MC. Next Generation of Ovarian Cancer Detection Using Aptamers. *Int J Mol Sci.* 2023 Mar  
612 28;24(7):6315. doi: 10.3390/ijms24076315. PMID: 37047289; PMCID: PMC10094455.
- 613 48. Vlasenkova R, Nurgalieva A, Akberova N, Bogdanov M, Kiyamova R. Characterization of  
614 SLC34A2 as a Potential Prognostic Marker of Oncological Diseases. *Biomolecules.* 2021 Dec  
615 14;11(12):1878. doi: 10.3390/biom11121878. PMID: 34944522; PMCID: PMC8699446.
- 616 49. Wang Y, Zhang L, Luo X, et al. EPS8L1 promotes migration and metastasis of ovarian cancer by  
617 activating Rac1/MAPK signaling pathway via upregulating TIAM2. *Authorea.* December 16,  
618 2022. DOI: 10.22541/au.167120661.17798120/v1.



- 619 50. Kim DK, Seo EJ, Choi EJ, Lee SI, Kwon YW, Jang IH, Kim SC, Kim KH, Suh DS, Seong-Jang  
620 K, Lee SC, Kim JH. Crucial role of HMGA1 in the self-renewal and drug resistance of ovarian  
621 cancer stem cells. *Exp Mol Med*. 2016 Aug 26;48(8):e255. doi: 10.1038/emm.2016.73. PMID:  
622 27561949; PMCID: PMC5007643.
- 623 51. Masciullo V, Baldassarre G, Pentimalli F, Berlingieri MT, Boccia A, Chiappetta G, Palazzo J,  
624 Manfioletti G, Giancotti V, Viglietto G, Scambia G, Fusco A. HMGA1 protein over-expression is  
625 a frequent feature of epithelial ovarian carcinomas. *Carcinogenesis*. 2003 Jul;24(7):1191-8. doi:  
626 10.1093/carcin/bgg075. Epub 2003 May 9. PMID: 12807722.
- 627 52. Ye C, Ren S, Sadula A, Guo X, Yuan M, Meng M, Li G, Zhang X, Yuan C. The expression  
628 characteristics of transmembrane protein genes in pancreatic ductal adenocarcinoma through  
629 comprehensive analysis of bulk and single-cell RNA sequence. *Front Oncol*. 2023 May  
630 17;13:1047377. doi: 10.3389/fonc.2023.1047377. PMID: 37265785; PMCID: PMC10229874.
- 631 53. Zhao L, Li Y, Zhang Z, Zou J, Li J, Wei R, Guo Q, Zhu X, Chu C, Fu X, Yue J, Li X. Meta-  
632 analysis based gene expression profiling reveals functional genes in ovarian cancer. *Biosci Rep*.  
633 2020 Nov 27;40(11):BSR20202911. doi: 10.1042/BSR20202911. PMID: 33135729; PMCID:  
634 PMC7677829.
- 635 54. Xi X, Cao T, Qian Y, Wang H, Ju S, Chen Y, Chen T, Yang J, Liang B, Hou S. CDC20 is a novel  
636 biomarker for improved clinical predictions in epithelial ovarian cancer. *Am J Cancer Res*. 2022  
637 Jul 15;12(7):3303-3317. PMID: 35968331; PMCID: PMC9360218.
- 638 55. Li C, Li W, Zhang Y, Zhang X, Liu T, Zhang Y, Yang Y, Wang L, Pan H, Ji J, Wang C. Increased  
639 expression of antisense lncRNA SPINT1-AS1 predicts a poor prognosis in colorectal cancer and  
640 is negatively correlated with its sense transcript. *Onco Targets Ther*. 2018 Jul 10;11:3969-3978.  
641 doi: 10.2147/OTT.S163883. PMID: 30022840; PMCID: PMC6044340.
- 642 56. Feng H, Gu ZY, Li Q, Liu QH, Yang XY, Zhang JJ. Identification of significant genes with poor  
643 prognosis in ovarian cancer via bioinformatical analysis. *J Ovarian Res*. 2019 Apr 22;12(1):35.  
644 doi: 10.1186/s13048-019-0508-2. PMID: 31010415; PMCID: PMC6477749.
- 645 57. Sehovic E, Hadrovic A, Dogan S. Detection and analysis of stable and flexible genes towards a  
646 genome signature framework in cancer. *Bioinformatics*. 2019 Nov 10;15(10):772-779. doi:  
647 10.6026/97320630015772. PMID: 31831960; PMCID: PMC6900328.
- 648 58. Li N, Li H, Wang Y, Cao L, Zhan X. Quantitative proteomics revealed energy metabolism  
649 pathway alterations in human epithelial ovarian carcinoma and their regulation by the antiparasite  
650 drug ivermectin: data interpretation in the context of 3P medicine. *EPMA J*. 2020 Oct  
651 10;11(4):661-694. doi: 10.1007/s13167-020-00224-z. PMID: 33240452; PMCID: PMC7680500.
- 652 59. He WP, Guo YY, Yang GP, Lai HL, Sun TT, Zhang ZW, Ouyang LL, Zheng Y, Tian LM, Li XH,  
653 You ZS, Xie D, Yang GF. CHD1L promotes EOC cell invasiveness and metastasis via the  
654 regulation of METAP2. *Int J Med Sci*. 2020 Aug 29;17(15):2387-2395. doi: 10.7150/ijms.48615.  
655 PMID: 32922205; PMCID: PMC7484650.
- 656 60. Soltan MA, Eldeen MA, Eid RA, Alyamani NM, Alqahtani LS, Albogami S, Jafri I, Park MN,  
657 Alsharif G, Fayad E, Mohamed G, Osman R, Kim B, Zaki MSA. A pan-cancer analysis reveals  
658 CHD1L as a prognostic and immunological biomarker in several human cancers. *Front Mol*  
659 *Biosci*. 2023 Mar 23;10:1017148. doi: 10.3389/fmolb.2023.1017148. PMID: 37033447; PMCID:  
660 PMC10076660.
- 661 61. He WP, Zhou J, Cai MY, Xiao XS, Liao YJ, Kung HF, Guan XY, Xie D, Yang GF. CHD1L  
662 protein is overexpressed in human ovarian carcinomas and is a novel predictive biomarker for  
663 patients survival. *BMC Cancer*. 2012 Sep 29;12:437. doi: 10.1186/1471-2407-12-437. PMID:  
664 23020525; PMCID: PMC3551745.
- 665 62. Li Y, He LR, Gao Y, Zhou NN, Liu Y, Zhou XK, Liu JF, Guan XY, Ma NF, Xie D. CHD1L  
666 contributes to cisplatin resistance by upregulating the ABCB1-NF- $\kappa$ B axis in human non-small-  
667 cell lung cancer. *Cell Death Dis*. 2019 Feb 4;10(2):99. doi: 10.1038/s41419-019-1371-1. PMID:  
668 30718500; PMCID: PMC6362241.

- 669 63. Saini U, Suarez AA, Naidu S, Wallbillich JJ, Bixel K, Wanner RA, Bice J, Kladney RD, Lester J,  
670 Karlan BY, Goodfellow PJ, Cohn DE, Selvendiran K. STAT3/PIAS3 Levels Serve as "Early  
671 Signature" Genes in the Development of High-Grade Serous Carcinoma from the Fallopian Tube.  
672 *Cancer Res.* 2018 Apr 1;78(7):1739-1750. doi: 10.1158/0008-5472.CAN-17-1671. Epub 2018 Jan  
673 16. PMID: 29339537; PMCID: PMC5907493.
- 674 64. Vizeacoumar FJ, Arnold R, Vizeacoumar FS, Chandrashekhar M, Buzina A, Young JT, Kwan JH,  
675 Sayad A, Mero P, Lawo S, Tanaka H, Brown KR, Baryshnikova A, Mak AB, Fedyshyn Y, Wang  
676 Y, Brito GC, Kasimer D, Makhnevych T, Ketela T, Datti A, Babu M, Emili A, Pelletier L, Wrana  
677 J, Wainberg Z, Kim PM, Rottapel R, O'Brien CA, Andrews B, Boone C, Moffat J. A negative  
678 genetic interaction map in isogenic cancer cell lines reveals cancer cell vulnerabilities. *Mol Syst*  
679 *Biol.* 2013 Oct 8;9:696. doi: 10.1038/msb.2013.54. PMID: 24104479; PMCID: PMC3817404.
- 680 65. Zhang C, Xu C, Ma C, Zhang Q, Bu S, Zhang DL, Yu L, Wang H. TRPs in Ovarian Serous  
681 Cystadenocarcinoma: The Expression Patterns, Prognostic Roles, and Potential Therapeutic  
682 Targets. *Front Mol Biosci.* 2022 Jun 24;9:915409. doi: 10.3389/fmolb.2022.915409. PMID:  
683 35813831; PMCID: PMC9263218.
- 684 66. Zhang Q, Wang X, Zhang X, Zhan J, Zhang B, Jia J, Chen J. TMEM14A aggravates the  
685 progression of human ovarian cancer cells by enhancing the activity of glycolysis. *Exp Ther Med.*  
686 2022 Aug 5;24(4):614. doi: 10.3892/etm.2022.11551. PMID: 36160886; PMCID: PMC9468797.
- 687 67. Tian Y, Zhang J, Chen L, Zhang X. The expression and prognostic role of IMPDH2 in ovarian  
688 cancer. *Ann Diagn Pathol.* 2020 Jun;46:151511. doi: 10.1016/j.anndiagpath.2020.151511. Epub  
689 2020 Mar 23. PMID: 32305001.
- 690 68. Onallah H, Mannully ST, Davidson B, Reich R. Exosome Secretion and Epithelial-Mesenchymal  
691 Transition in Ovarian Cancer Are Regulated by Phospholipase D. *Int J Mol Sci.* 2022 Oct  
692 31;23(21):13286. doi: 10.3390/ijms232113286. PMID: 36362078; PMCID: PMC9658871.
- 693 69. Li H, Chen L, Tong X, Dai H, Shi T, Cheng X, Sun M, Chen K, Wei Q, Wang M. Functional  
694 genetic variants of CTNBP1 predict platinum treatment response of Chinese epithelial ovarian  
695 cancer patients. *J Cancer.* 2020 Sep 30;11(23):6850-6860. doi: 10.7150/jca.48218. PMID:  
696 33123276; PMCID: PMC7592014.
- 697 70. Caetano MMM, Moreira GA, da Silva MR, Guimarães GR, Santos LO, Pacheco AA, Siqueira  
698 RP, Mendes FC, Marques Da Silva EA, Junior AS, Rangel Fietto JL, Saito Â, Boroni M, Bressan  
699 GC. Impaired expression of serine/arginine protein kinase 2 (SRPK2) affects melanoma  
700 progression. *Front Genet.* 2022 Sep 23;13:979735. doi: 10.3389/fgene.2022.979735. PMID:  
701 36212152; PMCID: PMC9537589.
- 702 71. Jiang C, Yuan B, Hang B, Mao JH, Zou X, Wang P. FHOD1 is upregulated in gastric cancer and  
703 promotes the proliferation and invasion of gastric cancer cells. *Oncol Lett.* 2021 Oct;22(4):712.  
704 doi: 10.3892/ol.2021.12973. Epub 2021 Aug 5. PMID: 34457067; PMCID: PMC8358613.
- 705 72. Li Z, Guo Q, Zhang J, Fu Z, Wang Y, Wang T, Tang J. The RNA-Binding Motif Protein Family in  
706 Cancer: Friend or Foe? *Front Oncol.* 2021 Nov 4;11:757135. doi: 10.3389/fonc.2021.757135.  
707 PMID: 34804951; PMCID: PMC8600070.
- 708 73. Alexandrova E, Pecoraro G, Sellitto A, Melone V, Ferravante C, Rocco T, Guacci A, Giurato G,  
709 Nassa G, Rizzo F, Weisz A, Tarallo R. An Overview of Candidate Therapeutic Target Genes in  
710 Ovarian Cancer. *Cancers (Basel).* 2020 Jun 4;12(6):1470. doi: 10.3390/cancers12061470. PMID:  
711 32512900; PMCID: PMC7352306.
- 712 74. El Khoury W, Nasr Z. Deregulation of ribosomal proteins in human cancers. *Biosci Rep.* 2021  
713 Dec 22;41(12):BSR20211577. doi: 10.1042/BSR20211577. PMID: 34873618; PMCID:  
714 PMC8685657.
- 715 75. Wu F, Liu Y, Hu S, Lu C. Ribosomal protein L31 (RPL31) inhibits the proliferation and migration  
716 of gastric cancer cells. *Heliyon.* 2023 Jan 20;9(2):e13076. doi: 10.1016/j.heliyon.2023.e13076.  
717 PMID: 36816257; PMCID: PMC9936522.
- 718 76. Wang L, Sun L, Liu R, Mo H, Niu Y, Chen T, Wang Y, Han S, Tu K, Liu Q. Long non-coding  
719 RNA MAPKAPK5-AS1/PLAGL2/HIF-1 $\alpha$  signaling loop promotes hepatocellular carcinoma

- 720 progression. *J Exp Clin Cancer Res*. 2021 Feb 17;40(1):72. doi: 10.1186/s13046-021-01868-z.  
721 PMID: 33596983; PMCID: PMC7891009.
- 722 77. Sha Z, Zhou J, Wu Y, Zhang T, Li C, Meng Q, Musunuru PP, You F, Wu Y, Yu R, Gao S. BYSL  
723 Promotes Glioblastoma Cell Migration, Invasion, and Mesenchymal Transition Through the  
724 GSK-3 $\beta$ / $\beta$ -Catenin Signaling Pathway. *Front Oncol*. 2020 Oct 15;10:565225. doi:  
725 10.3389/fonc.2020.565225. PMID: 33178594; PMCID: PMC7593785.
- 726 78. Gao S, Sha Z, Zhou J, Wu Y, Song Y, Li C, Liu X, Zhang T, Yu R. BYSL contributes to tumor  
727 growth by cooperating with the mTORC2 complex in gliomas. *Cancer Biol Med*. 2021 Feb  
728 15;18(1):88-104. doi: 10.20892/j.issn.2095-3941.2020.0096. PMID: 33628587; PMCID:  
729 PMC7877178.
- 730 79. Li Q, Ren CC, Chen YN, Yang L, Zhang F, Wang BJ, Zhu YH, Li FY, Yang J, Zhang ZA. A Risk  
731 Score Model Incorporating Three m6A RNA Methylation Regulators and a Related Network of  
732 miRNAs-m6A Regulators-m6A Target Genes to Predict the Prognosis of Patients With Ovarian  
733 Cancer. *Front Cell Dev Biol*. 2021 Sep 23;9:703969. doi: 10.3389/fcell.2021.703969. PMID:  
734 34631700; PMCID: PMC8495156.
- 735 80. Kryczka J, Boncela J. Integrated Bioinformatics Analysis of the Hub Genes Involved in  
736 Irinotecan Resistance in Colorectal Cancer. *Biomedicines*. 2022 Jul 16;10(7):1720. doi:  
737 10.3390/biomedicines10071720. PMID: 35885025; PMCID: PMC9312838.
- 738 81. Zhu QY, He ZM, Cao WM, Li B. The role of TSC2 in breast cancer: a literature review. *Front*  
739 *Oncol*. 2023 May 12;13:1188371. doi: 10.3389/fonc.2023.1188371. PMID: 37251941; PMCID:  
740 PMC10213421.
- 741 82. Cai J, Sun M, Hu B, Windle B, Ge X, Li G, Sun Y. Sorting Nexin 5 Controls Head and Neck  
742 Squamous Cell Carcinoma Progression by Modulating FBW7. *J Cancer*. 2019 Jun 2;10(13):2942-  
743 2952. doi: 10.7150/jca.31055. PMID: 31281471; PMCID: PMC6590026.
- 744 83. Lin C, Xin S, Huang X, Zhang F. PTPRA facilitates cancer growth and migration via the TNF- $\alpha$ -  
745 mediated PTPRA-NF- $\kappa$ B pathway in MCF-7 breast cancer cells. *Oncol Lett*. 2020  
746 Nov;20(5):131. doi: 10.3892/ol.2020.11992. Epub 2020 Aug 20. PMID: 32934700; PMCID:  
747 PMC7471670.
- 748 84. Fierheller CT, Alenezi WM, Serruya C, Revil T, Amuzu S, Bedard K, Subramanian DN, Fewings  
749 E, Bruce JP, Prokopec S, Bouchard L, Provencher D, Foulkes WD, El Haffaf Z, Mes-Masson  
750 AM, Tischkowitz M, Campbell IG, Pugh TJ, Greenwood CMT, Ragoussis J, Tonin PN. Molecular  
751 Genetic Characteristics of FANCI, a Proposed New Ovarian Cancer Predisposing Gene. *Genes*  
752 (Basel). 2023 Jan 20;14(2):277. doi: 10.3390/genes14020277. PMID: 36833203; PMCID:  
753 PMC9956348.
- 754 85. Fierheller CT, Guitton-Sert L, Alenezi WM, Revil T, Oros KK, Gao Y, Bedard K, Arcand SL,  
755 Serruya C, Behl S, Meunier L, Fleury H, Fewings E, Subramanian DN, Nadaf J, Bruce JP, Bell R,  
756 Provencher D, Foulkes WD, El Haffaf Z, Mes-Masson AM, Majewski J, Pugh TJ, Tischkowitz  
757 M, James PA, Campbell IG, Greenwood CMT, Ragoussis J, Masson JY, Tonin PN. A functionally  
758 impaired missense variant identified in French Canadian families implicates FANCI as a  
759 candidate ovarian cancer-predisposing gene. *Genome Med*. 2021 Dec 3;13(1):186. doi:  
760 10.1186/s13073-021-00998-5. PMID: 34861889; PMCID: PMC8642877.
- 761 86. Cordas Dos Santos DM, Eilers J, Sosa Vizcaino A, Orlova E, Zimmermann M, Stanulla M,  
762 Schrappe M, Börner K, Grimm D, Muckenthaler MU, Kulozik AE, Kunz JB. MAP3K7 is  
763 recurrently deleted in pediatric T-lymphoblastic leukemia and affects cell proliferation  
764 independently of NF- $\kappa$ B. *BMC Cancer*. 2018 Jun 18;18(1):663. doi: 10.1186/s12885-018-4525-0.  
765 PMID: 29914415; PMCID: PMC6006985.
- 766 87. Sakuma K, Sasaki E, Kimura K, Komori K, Shimizu Y, Yatabe Y, Aoki M. HNRNPLL stabilizes  
767 mRNA for DNA replication proteins and promotes cell cycle progression in colorectal cancer  
768 cells. *Cancer Sci*. 2018 Aug;109(8):2458-2468. doi: 10.1111/cas.13660. Epub 2018 Jul 16. PMID:  
769 29869816; PMCID: PMC6113449.

- 770 88. Shi Y, Mo X, Hong S, Li T, Chen B, Chen G. Studying the Role and Molecular Mechanisms of  
771 MAP4K3 in Sorafenib Resistance of Hepatocellular Carcinoma. *Biomed Res Int.* 2020 Nov  
772 5;2020:4965670. doi: 10.1155/2020/4965670. PMID: 33204699; PMCID: PMC7665914.
- 773 89. Muys BR, Sousa JF, Praça JR, de Araújo LF, Sarshad AA, Anastasakis DG, Wang X, Li XL, de  
774 Molfetta GA, Ramão A, Lal A, Vidal DO, Hafner M, Silva WA. miR-450a Acts as a Tumor  
775 Suppressor in Ovarian Cancer by Regulating Energy Metabolism. *Cancer Res.* 2019 Jul  
776 1;79(13):3294-3305. doi: 10.1158/0008-5472.CAN-19-0490. Epub 2019 May 17. PMID:  
777 31101765; PMCID: PMC6606360.
- 778 90. Miśkiewicz J, Mielczarek-Palacz A, Gola JM. MicroRNAs as Potential Biomarkers in  
779 Gynecological Cancers. *Biomedicines.* 2023 Jun 13;11(6):1704. doi:  
780 10.3390/biomedicines11061704. PMID: 37371799; PMCID: PMC10296063.
- 781 91. Zhao C, Li Y, Qiu C, Chen J, Wu H, Wang Q, Ma X, Song K, Kong B. Splicing Factor DDX23,  
782 Transcriptionally Activated by E2F1, Promotes Ovarian Cancer Progression by Regulating  
783 FOXM1. *Front Oncol.* 2021 Dec 13;11:749144. doi: 10.3389/fonc.2021.749144. PMID:  
784 34966670; PMCID: PMC8710544.
- 785 92. Lisowska KM, Olbryt M, Dudaladava V, Pamuła-Piłat J, Kujawa K, Grzybowska E, Jarzab M,  
786 Student S, Rzepecka IK, Jarzab B, Kupryjańczyk J. Gene expression analysis in ovarian cancer -  
787 faults and hints from DNA microarray study. *Front Oncol.* 2014 Jan 28;4:6. doi:  
788 10.3389/fonc.2014.00006. PMID: 24478986; PMCID: PMC3904181.
- 789 93. Zhang Z, Zhu Q. WD Repeat and HMG Box DNA Binding Protein 1: An Oncoprotein at the Hub  
790 of Tumorigenesis and a Novel Therapeutic Target. *Int J Mol Sci.* 2023 Aug 6;24(15):12494. doi:  
791 10.3390/ijms241512494. PMID: 37569867; PMCID: PMC10420296.
- 792 94. Xian Q, Zhu D. The Involvement of WDHD1 in the Occurrence of Esophageal Cancer as a  
793 Downstream Target of PI3K/AKT Pathway. *J Oncol.* 2022 Apr 5;2022:5871188. doi:  
794 10.1155/2022/5871188. PMID: 35422862; PMCID: PMC9005294.
- 795 95. Thomas H, Nasim MM, Sarraf CE, Alison MR, Love S, Lambert HE, Price P. Proliferating cell  
796 nuclear antigen (PCNA) immunostaining--a prognostic factor in ovarian cancer? *Br J Cancer.*  
797 1995 Feb;71(2):357-62. doi: 10.1038/bjc.1995.72. PMID: 7841053; PMCID: PMC2033602.
- 798 96. Zhu X, You S, Du X, Song K, Lv T, Zhao H, Yao Q. LRRC superfamily expression in stromal  
799 cells predicts the clinical prognosis and platinum resistance of ovarian cancer. *BMC Med*  
800 *Genomics.* 2023 Jan 18;16(1):10. doi: 10.1186/s12920-023-01435-9. PMID: 36653841; PMCID:  
801 PMC9850808.
- 802 97. Wu J, Lu F, Yu B, Wang W, Ye X. The oncogenic role of SNRPB in human tumors: A pan-cancer  
803 analysis. *Front Mol Biosci.* 2022 Oct 6;9:994440. doi: 10.3389/fmolb.2022.994440. PMID:  
804 36275630; PMCID: PMC9582665.
- 805 98. Dogan B, Gumusoglu E, Ulgen E, Sezerman OU, Gunel T. Integrated bioinformatics analysis of  
806 validated and circulating miRNAs in ovarian cancer. *Genomics Inform.* 2022 Jun;20(2):e20. doi:  
807 10.5808/gi.21067. Epub 2022 Jun 30. PMID: 35794700; PMCID: PMC9299562.
- 808 99. Wagenbach M, Vicente JJ, Ovechkina Y, Domnitz S, Wordeman L. Functional characterization of  
809 MCAK/Kif2C cancer mutations using high-throughput microscopic analysis. *Mol Biol Cell.* 2020  
810 Mar 19;31(7):580-588. doi: 10.1091/mbc.E19-09-0503. Epub 2019 Nov 20. PMID: 31746663;  
811 PMCID: PMC7202071.
- 812 100. Tong D, Volm T, Eberhardt E, Krainer M, Leodolter S, Kreienberg R, Zeillinger R. Rad52  
813 gene mutations in breast/ovarian cancer families and sporadic ovarian carcinoma patients. *Oncol*  
814 *Rep.* 2003 Sep-Oct;10(5):1551-3. PMID: 12883740.
- 815 101. Diao Y, Li Y, Wang Z, Wang S, Li P, Kong B. SF3B4 promotes ovarian cancer  
816 progression by regulating alternative splicing of RAD52. *Cell Death Dis.* 2022 Feb 24;13(2):179.  
817 doi: 10.1038/s41419-022-04630-1. PMID: 35210412; PMCID: PMC8873359.
- 818 102. Challa S, Khulpateea BR, Nandu T, Camacho CV, Ryu KW, Chen H, Peng Y, Lea JS,  
819 Kraus WL. Ribosome ADP-ribosylation inhibits translation and maintains proteostasis in cancers.

820 Cell. 2021 Aug 19;184(17):4531-4546.e26. doi: 10.1016/j.cell.2021.07.005. Epub 2021 Jul 26.  
821 PMID: 34314702; PMCID: PMC8380725.  
822 103. Cao M, Deng Y, Deng Y, Wu J, Yang C, Wang Z, Hou Q, Fu H, Ren Z, Xia X, Li Y, Wang  
823 W, Xu H, Liao X, Shu Y. Characterization of immature ovarian teratomas through single-cell  
824 transcriptome. Front Immunol. 2023 Mar 3;14:1131814. doi: 10.3389/fimmu.2023.1131814.  
825 PMID: 36936909; PMCID: PMC10020330.  
826
